# Supplementary material for: Targeted isolation of sulfur-containing metabolites from Lsr2-deletion mutant strain of Streptomyces roseosporus
Source: Royal Society of Chemistry journal article supplement (doi:10.1039/c7ra06482a), 2017-01-01
Supplement: c7ra06482a1.pdf [file c7ra06482a1.pdf]

## Supplementary information

# Targeted Isolation of Sulfur-containing Metabolites from *Lsr2*-deletion Mutant Strain of *Streptomyces roseosporus*

Lina Deng,<sup>a</sup> Rui Wang,<sup>a</sup> Guowei Wang,<sup>\*a</sup> Mingxu Liu,<sup>a</sup> Guojian Liao,<sup>a</sup> Zhihua Liao,<sup>b</sup> and Min Chen<sup>\*a</sup>

<sup>a</sup> College of Pharmaceutical Sciences, Key Laboratory of Luminescent and Real-Time Analytical Chemistry (Southwest University), Ministry of Education, Southwest University, Chongqing 400715, P.R. China

<sup>b</sup> School of Life Sciences, Southwest University, Chongqing 400715, P.R. China

## List of supplementary information

Supplementary Experimental section

Table S1. Sulfur-containing metabolites detected and characterized in  $\Delta Sr/lsr2$  strain by UPLC-QTOF-MS and HR-MS/MS analysis.

Table S2. Cytotoxic activities of **1-13** isolated from the  $\Delta Sr/lsr2$  strain of *S roseosporus*

Figure S1. HR-MS/MS spectra and proposed fragmentation pathway of peaks 17 and 18 (1 and 2).

Figure S2. HPLC guided isolation of sulfur-containing metabolites.

Figure S3. X-ray crystal structure of **10**.

Figure S4.  $^1\text{H}$  NMR (400 MHz, DMSO) spectrum of compound **1**.

Figure S5.  $^{13}\text{C}$  NMR (100 MHz, DMSO) spectrum of compound **1**.

Figure S6. DEPT 135 (100 MHz, DMSO) spectrum of compound **1**.

Figure S7. HSQC (400 MHz, DMSO) spectrum of compound **1**.

Figure S8. HMBC (400 MHz, DMSO) spectrum of compound **1**.

Figure S9. HRESIMS spectrum of compound **1**.

Figure S10.  $^1\text{H}$  NMR (400 MHz, DMSO) spectrum of compound **2**.

Figure S11.  $^{13}\text{C}$  NMR (100 MHz, DMSO) spectrum of compound **2**.

Figure S12. HSQC (400 MHz, DMSO) spectrum of compound **2**.

Figure S13. HMBC (400 MHz, DMSO) spectrum of compound **2**.

Figure S14. HRESIMS spectrum of compound **2**.

Figure S15.  $^1\text{H}$  NMR (400 MHz, DMSO) spectrum of compound **3**.

Figure S16.  $^{13}\text{C}$  NMR (100 MHz, DMSO) spectrum of compound **3**.

Figure S17. DEPT 135 (100 MHz, DMSO) spectrum of compound **3**.

Figure S18. HSQC(400 MHz, DMSO) spectrum of compound **3**.

Figure S19. HMBC (400 MHz, DMSO) spectrum of compound **3**.

Figure S20. HRESIMS spectrum of compound **3**.

Figure S21.  $^1\text{H}$  NMR (400 MHz, DMSO) spectrum of compound **4**.

Figure S22.  $^{13}\text{C}$  NMR (100 MHz, DMSO) spectrum of compound **4**.

Figure S23. DEPT 135 (100 MHz, DMSO) spectrum of compound **4**.

Figure S24. HSQC (400 MHz, DMSO) spectrum of compound **4**.

Figure S25. HMBC (400 MHz, DMSO) spectrum of compound **4**.

Figure S26. HRESIMS spectrum of compound **4**.

Figure S27.  $^1\text{H}$  NMR (400 MHz, DMSO) spectrum of compound **5**.

Figure S28.  $^{13}\text{C}$  NMR (100 MHz, DMSO) spectrum of compound **5**.

Figure S29. HSQC (400 MHz, DMSO) spectrum of compound **5**.

Figure S30. HMBC (400 MHz, DMSO) spectrum of compound **5**.

Figure S31. HRESIMS spectrum of compound **5**.

Figure S32.  $^1\text{H}$  NMR (400 MHz, DMSO) spectrum of compound **6**.

Figure S33.  $^{13}\text{C}$  NMR (100 MHz, DMSO) spectrum of compound **6**.

Figure S34. DEPT 135 (100 MHz, DMSO) spectrum of compound **6**.

Figure S35. HSQC (400 MHz, DMSO) spectrum of compound **6**.

Figure S36. HMBC (400 MHz, DMSO) spectrum of compound **6**.

Figure S37. HRESIMS spectrum of compound **6**.

## Supplementary Experimental section

Cytotoxicity was evaluated against SGC7901, MDA-MB-231, A549 and HepG 2 cell lines by the MTT colorimetric method.<sup>1</sup> Cell lines were cultured in Dulbecco's modified Eagle's medium (DMEM) supplemented with 10% (v/v) fetal bovine serum, 2mM L-glutamine, 100 units/mL penicillin, and 100 ug/mL streptomycin at 37 °C in humidified 5% CO<sub>2</sub>. For cytotoxicity assays, cells were seeded in 96-well plates at optimal cell density (10000 cells per well) to ensure exponential growth for the duration of the assay. After a 24h preincubation growth, the medium was replaced with experimental medium containing the appropriate drug concentration or vehicle controls (0.1% v/v DMSO). After 48 h incubation, cell viability was measured using Alamar Blue reagent according to the manufacturer's instructions. Absorbance was measured at 490 nm. Results were expressed as the mean  $\pm$  standard error for six replicates as a percentage of vehicle control (take as 100%). The percent growth was standardized to controls (0.1% DMSO as negative control) using Microsoft Excel 2013. A statistical analysis including IC<sub>50</sub> determination and graphical output was performed in GraphPad Prism 5 using nonlinear regression variable slope curve fitting.

1 T. Mosmann, *J. Immunol. Methods.*, 1983, 65, 55-63.

Table S1. Sulfur-containing metabolites detected and characterized in  $\Delta Sr/sr2$  strain by UPLC-QTOF-MS and HR-MS/MS analysis

| Peaks | $t_R$<br>(min) | [M+H] <sup>+</sup> or<br>[M+Na] <sup>+</sup> | MS/MS                                                                                                  | Molecular<br>Formula                                            | ppm  | Tentatively<br>Identification[Ref] | Molecular formula is previous<br>reported in <i>Streptomyces</i><br>spp. |
|-------|----------------|----------------------------------------------|--------------------------------------------------------------------------------------------------------|-----------------------------------------------------------------|------|------------------------------------|--------------------------------------------------------------------------|
| 1     | 8.67           | 398.1508                                     | 266.1075,248.0944,231.0710,182.0502,160.1115,134.0465                                                  | C <sub>24</sub> H <sub>19</sub> N <sub>3</sub> O <sub>3</sub>   | -0.2 | unknown                            | no                                                                       |
| 2     | 9.57           | 215.1195                                     | 187.1225,170.0967,160.1130,143.0841,132.0812,103.0569                                                  | C <sub>13</sub> H <sub>14</sub> N <sub>2</sub> O                | 5.0  | unknown                            | no                                                                       |
| 3     | 10.25          | 261.1249                                     | 233.1293,215.1190,170.0687,120.0818,114.0560                                                           | C <sub>14</sub> H <sub>16</sub> N <sub>2</sub> O <sub>3</sub>   | 3.8  | cyclo(L-6-Hyp-L-Phe)[1]            | Streptomyces sp. DA18                                                    |
| 4     | 10.64          | 280.0531 <sup>#</sup>                        | 244.0552,228.0589,214.0445,189.0488,188.0386,<br>182.0722,157.0761,130.0654                            | C <sub>13</sub> H <sub>11</sub> N <sub>3</sub> OS               | 3.5  | SF2738D [2-3]                      | Streptomyces sp.                                                         |
| 5     | 11.04          | 285.0668 <sup>#</sup>                        | 249.0688,233.0752,219.0598,203.0646,189.0480,<br>188.0385,157.0765,130.0657                            | C <sub>13</sub> H <sub>14</sub> N <sub>2</sub> O <sub>2</sub> S | -2.1 | unknown                            | Streptomyces sp. TPU1236A<br>and other Streptomyces species              |
| 6     | 11.31          | 285.0669 <sup>#</sup>                        | 247.0915,233.0745,219.0595,203.0647,189.0481,<br>188.0389,157.0760,130.0655                            | C <sub>13</sub> H <sub>14</sub> N <sub>2</sub> O <sub>2</sub> S | -1.7 | SF2738C [2-3]                      | Streptomyces sp. TPU1236A<br>and other Streptomyces<br>species           |
| 7     | 12.69          | 292.0751                                     | 274.0642,260.0487,244.0541,230.0391,214.0431,189.0479<br>,188.0385,182.0712,157.0771,130.0658          | C <sub>13</sub> H <sub>13</sub> N <sub>3</sub> O <sub>3</sub> S | 1.7  | Pyrisulfoxin A [3-4]               | Streptomyces californicus                                                |
| 8     | 13.23          | 271.0598                                     | 243.0619,215.0697,197.0591,169.0630,153.0174,<br>149.0234,91.0547,65.0384                              | C <sub>15</sub> H <sub>10</sub> O <sub>5</sub>                  | 3.0  | unknown                            | Streptomyces sp. AC35 and<br>other Streptomyces species                  |
| 9     | 13.75          | 291.0794                                     | 273.0695,259.0539,243.0593,229.0446,204.0485,<br>188.0537,181.0759,156.0802,130.0660                   | C <sub>14</sub> H <sub>14</sub> N <sub>2</sub> O <sub>3</sub> S | -3.1 | unknown                            | no                                                                       |
| 10    | 14.39          | 219.1751                                     | 203.1433,188.1218,161.1317,147.1147,133.1024,119.0842                                                  | C <sub>15</sub> H <sub>22</sub> O                               | 0.9  | unknown                            | no                                                                       |
| 11    | 15.01          | 304.1129                                     | 290.0972,262.1018,260.0850,247.0900,233.0741,232.0915<br>,203.0647,189.0490,188.0385,157.0770,130.0655 | C <sub>15</sub> H <sub>17</sub> N <sub>3</sub> O <sub>2</sub> S | 3.3  | SF2738E[2-3]                       | Streptomyces sp.                                                         |
| 12    | 16.41          | 252.0763 <sup>#</sup>                        | 212.0831,198.0672,182.0717,157.0766,130.0654                                                           | C <sub>12</sub> H <sub>11</sub> N <sub>3</sub> O <sub>2</sub>   | 4.7  | Caerulomycin A [3,5]               | Streptomyces caeruleus                                                   |
| 13    | 17.23          | 261.1613                                     | 233.1660,170.1052,130.1229,120.0811                                                                    | C <sub>15</sub> H <sub>20</sub> N <sub>2</sub> O <sub>2</sub>   | 3.8  | Cyclo-(L-phe-L-Leu) [6]            | Streptomyces sp. H7372 and<br>other Streptomyces species                 |
| 14    | 18.14          | 274.0644                                     | 244.0543,230.0342,214.0435,189.0482,188.0389,<br>182.0715,157.0762,130.0655                            | C <sub>13</sub> H <sub>11</sub> N <sub>3</sub> O <sub>2</sub> S | -2.1 | Pyrisulfoxin B [3-4]               | Streptomyces californicus                                                |
| 15    | 18.22          | 273.0694                                     | 259.0545,243.0590,229.0441,204.0480,188.0540,<br>181.0770,156.0810,130.0658                            | C <sub>14</sub> H <sub>12</sub> N <sub>2</sub> O <sub>2</sub> S | -1.4 | unknown                            | no                                                                       |
| 16    | 19.22          | 279.0791                                     | 263.0850,249.0693,235.0537,219.0597,203.0650,                                                          | C <sub>14</sub> H <sub>12</sub> N <sub>2</sub> O <sub>2</sub> S | -0.4 | unknown                            | no                                                                       |

|     |       |          |                                                                             |                                                                 |      |                 |                                                          |  |
|-----|-------|----------|-----------------------------------------------------------------------------|-----------------------------------------------------------------|------|-----------------|----------------------------------------------------------|--|
|     |       |          | 189.0484,157.0763,130.0652                                                  |                                                                 |      |                 |                                                          |  |
| 17  | 20.31 | 276.0797 | 258.0693,244.0537,214.0439,212.0824,189.0487,<br>182.0712,157.0768,130.0655 | C <sub>13</sub> H <sub>13</sub> N <sub>3</sub> O <sub>2</sub> S | -3.6 | unknown         | Streptomyces sp. CS40                                    |  |
| 18  | 20.43 | 276.0794 | 231.0583,217.0434,216.0348,189.0479,188.0388,<br>185.0707,157.0761,130.0652 | C <sub>13</sub> H <sub>13</sub> N <sub>3</sub> O <sub>2</sub> S | -4.7 | unknown         | Streptomyces sp. CS40                                    |  |
| 19  | 21.44 | 276.0795 | 258.0701,244.0536,214.0441,212.0821,189.0486,<br>182.0713,157.0765,130.0657 | C <sub>13</sub> H <sub>13</sub> N <sub>3</sub> O <sub>2</sub> S | -4.3 | SF2738A/B [2-3] | Streptomyces sp. CS40                                    |  |
| 20a | 21.74 | 284.2235 | 266.2128,232.1345,212.1166,173.1198,143.0851                                | C <sub>9</sub> H <sub>29</sub> N <sub>7</sub> OS                | 0.7  | unknown         | no                                                       |  |
| 20b | 21.74 | 284.1387 | 256.2277,219.1737,194.0954,160.1081,147.1065,133.0856                       | C <sub>16</sub> H <sub>17</sub> N <sub>3</sub> O <sub>2</sub>   | -4.2 | unknown         | Streptomyces sp. H7372 and<br>other Streptomyces species |  |
| 21  | 22.68 | 298.2400 | 280.2274,270.2439,239.1414,184.0747,160.1102,117.0930                       | C <sub>10</sub> H <sub>31</sub> N <sub>7</sub> OS               | 4.0  | unknown         | no                                                       |  |
| 22  | 23.48 | 330.3370 | 312.3283,298.2385,266.2117,233.1741,209.1686,<br>175.1346,131.0721          | C <sub>20</sub> H <sub>43</sub> NO <sub>2</sub>                 | -0.6 | unknown         | no                                                       |  |

# [M+Na]<sup>+</sup>

## References

- [1] N. A. Furtado, R. Vessecchi, J. C. Tomaz, S. E. Galembeck, J. K. Bastos, N. P. Lopes, A. E. Crotti, *J. Mass Spectrom.*, 2007, 42, 1279-1286.
- [2] S.Gomi, S. Amano, E. Sato, S. Miyadoh, Y. Kodama, *J. Antibiot.*, 1994, 47, 1385-1394.
- [3] J. Regueiro, A. Giri, T. Wenzl, *Anal. Chem.*, 2016, 88, 6500-6508.
- [4] N. Tsuge, K. Furihata, K. Shin-Ya, Y. Hayakawa, H. Seto, *J. Antibiot.*, 1999, 52, 505-507.
- [5] M. Ambavane, P. Tokdar, R. Parab, E. S. Sreekumar, G. Mahajan, P. D. Mishra, L. Dsouza, P. Ranadive, *Advances in Microbiology*, 2014, 4, 567-578.
- [6] K. Yamamoto, M. Hayashi, Y. Murakami, Y. Araki, Y. Otsuka, T. Kashiwagi, T. Shimamura, H. Ukeda, *Bios. Biotechnol. Biochem.*, 2016, 80, 172-177.

Table S2 Cytotoxic activities of **1-13** isolated from the  $\Delta Srlsr2$  strain of *S roseosporus*

| compound  | IC <sub>50</sub> (μM) |            |          |         |
|-----------|-----------------------|------------|----------|---------|
|           | SGC7901               | MDA-MB-231 | A549     | HepG2   |
| <b>1</b>  | >40                   | >40        | >40      | >40     |
| <b>2</b>  | >40                   | >40        | >40      | >40     |
| <b>3</b>  | >40                   | >40        | >40      | >40     |
| <b>4</b>  | >40                   | >40        | >40      | >40     |
| <b>5</b>  | >40                   | >40        | >40      | >40     |
| <b>6</b>  | >40                   | >40        | >40      | >40     |
| <b>7</b>  | 1.7±0.5               | 6.3±1.0    | 14.7±3.2 | 5.8±0.5 |
| <b>8</b>  | >40                   | >40        | >40      | >40     |
| <b>9</b>  | >40                   | >40        | 21.3±2.9 | >40     |
| <b>10</b> | >40                   | >40        | >40      | >40     |
| <b>11</b> | >40                   | 34.5±5.3   | 25.8±0.7 | 7.2±1.1 |
| <b>12</b> | >40                   | >40        | >40      | >40     |
| <b>13</b> | >40                   | >40        | >40      | >40     |

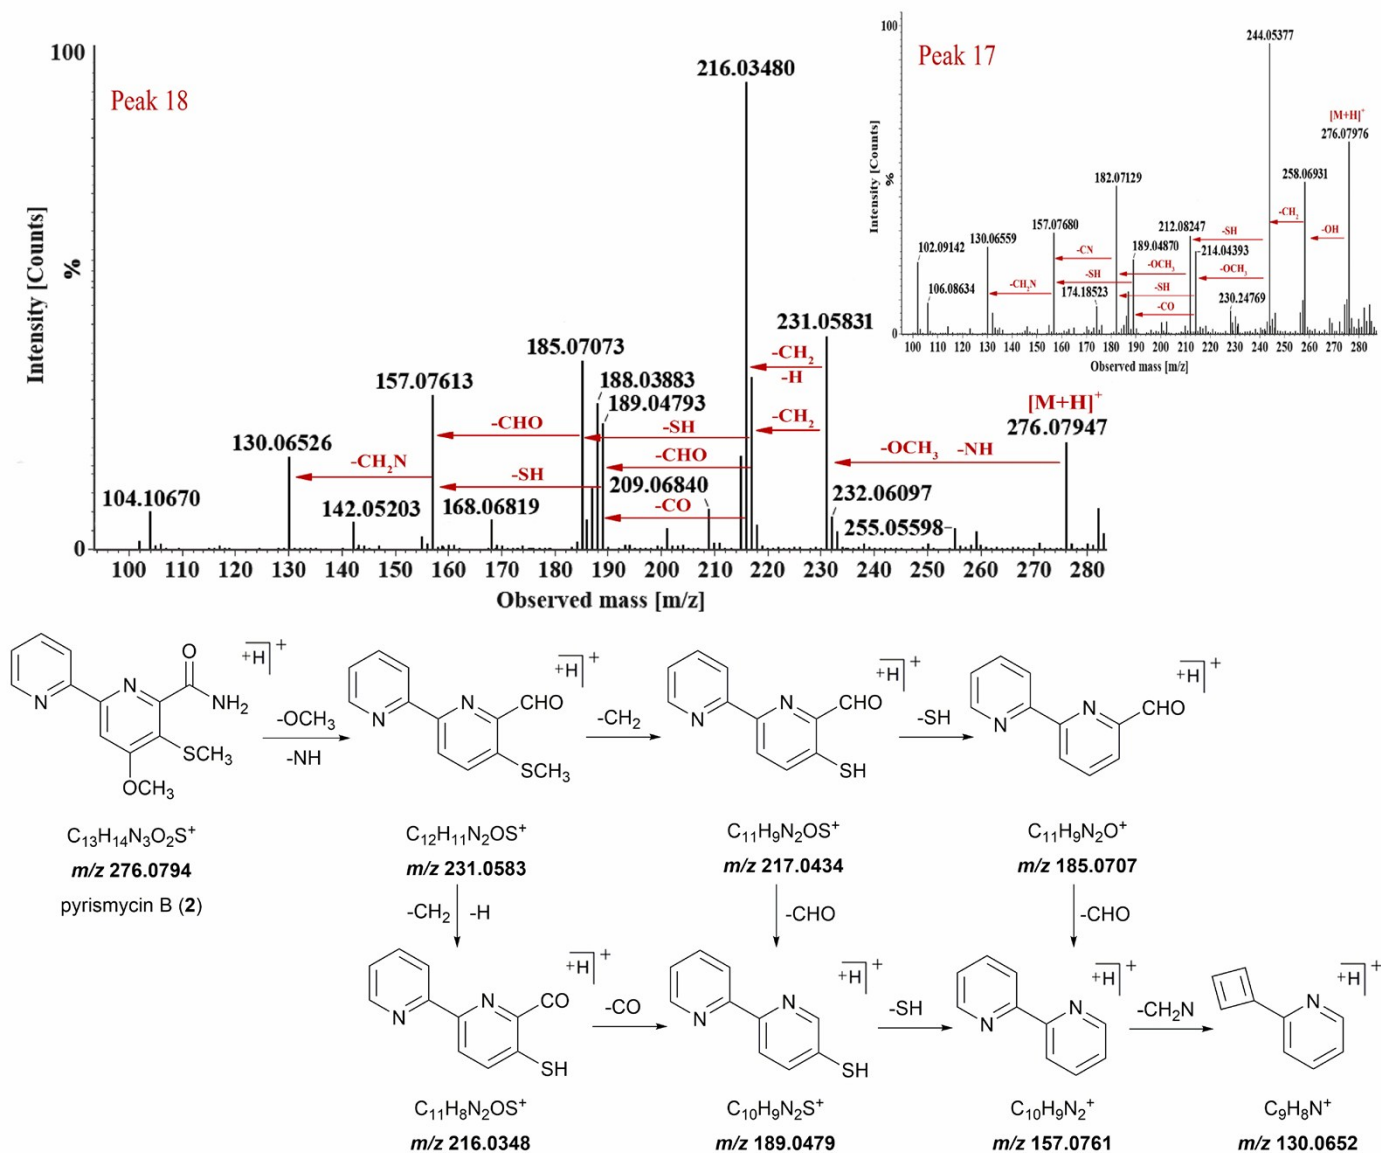

Figure S1 HR-MS/MS spectra and proposed fragmentation pathway of peaks 17 and 18 (**1** and **2**).



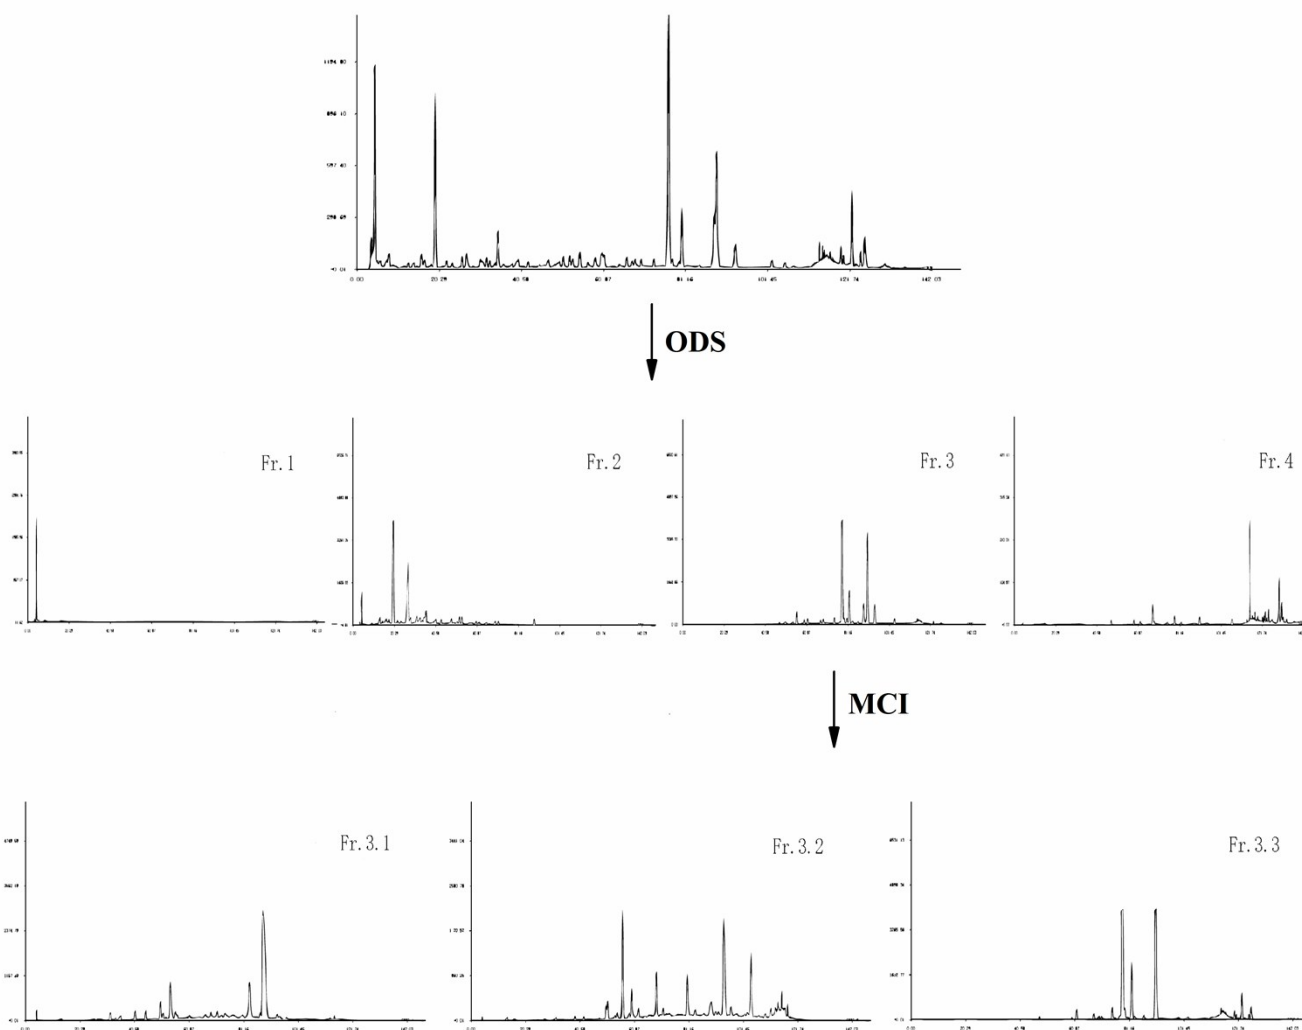

Figure S2. HPLC guided isolation of sulfur-containing metabolites.

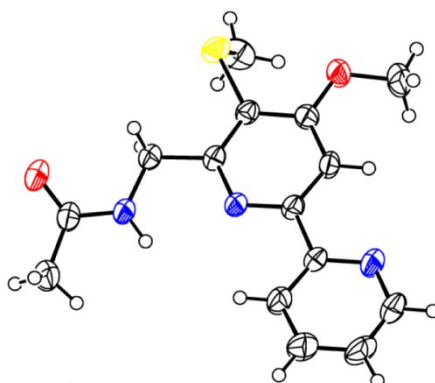

Figure S3. X-ray crystal structure of **10**

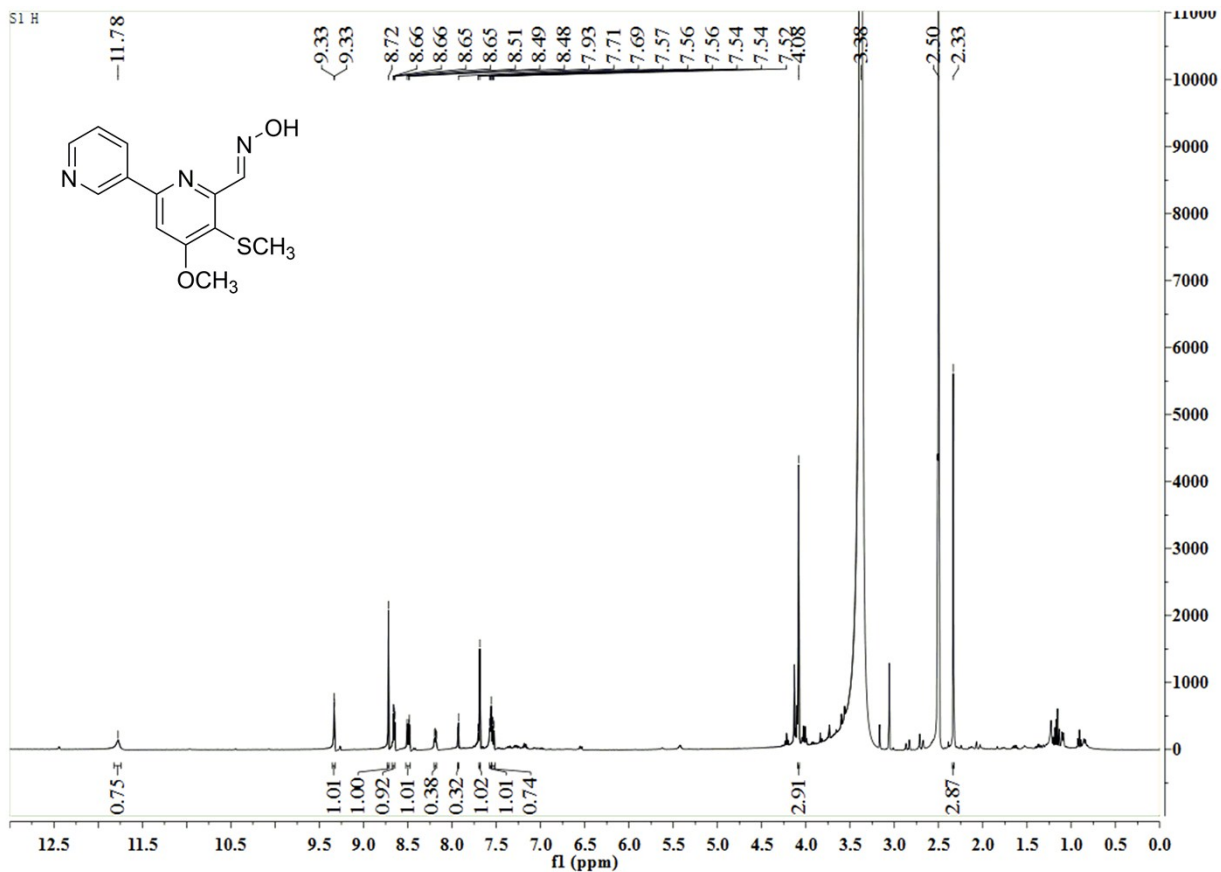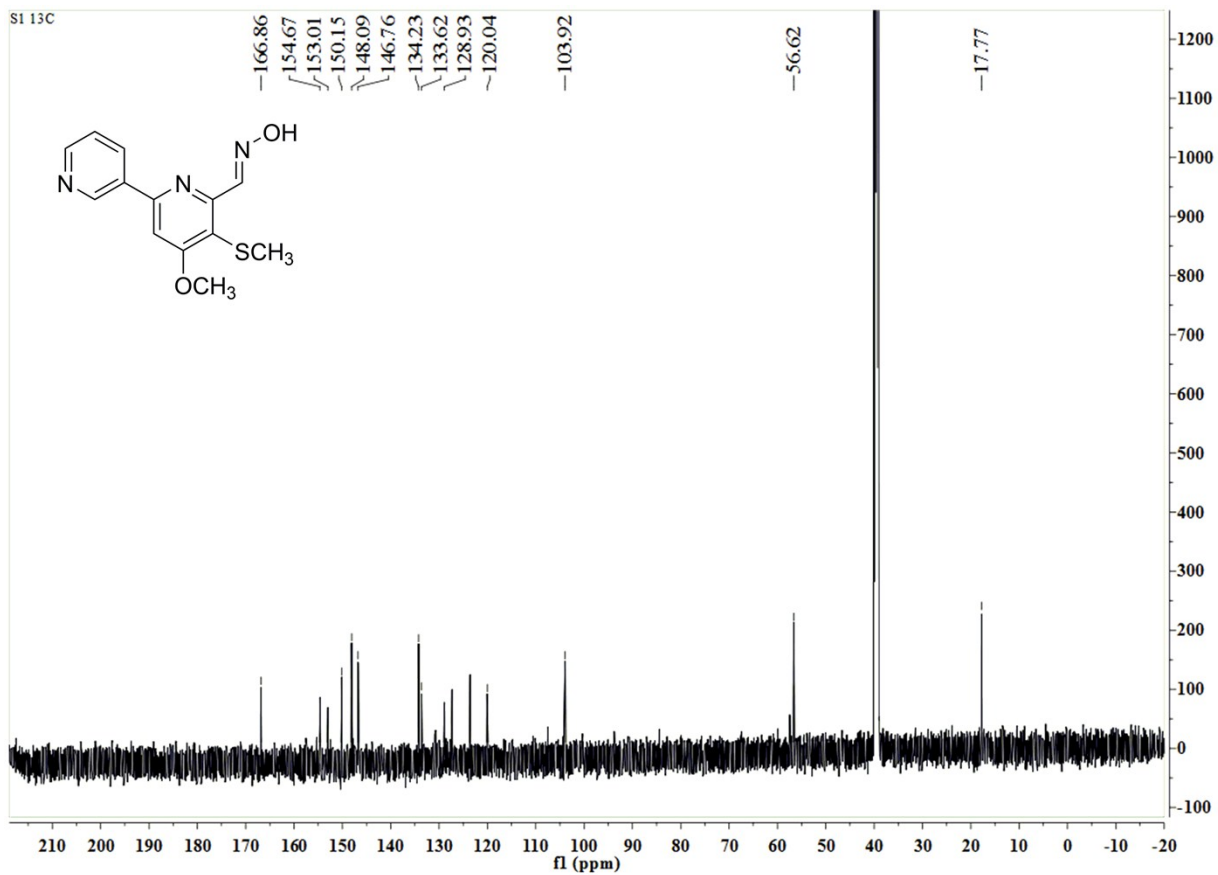

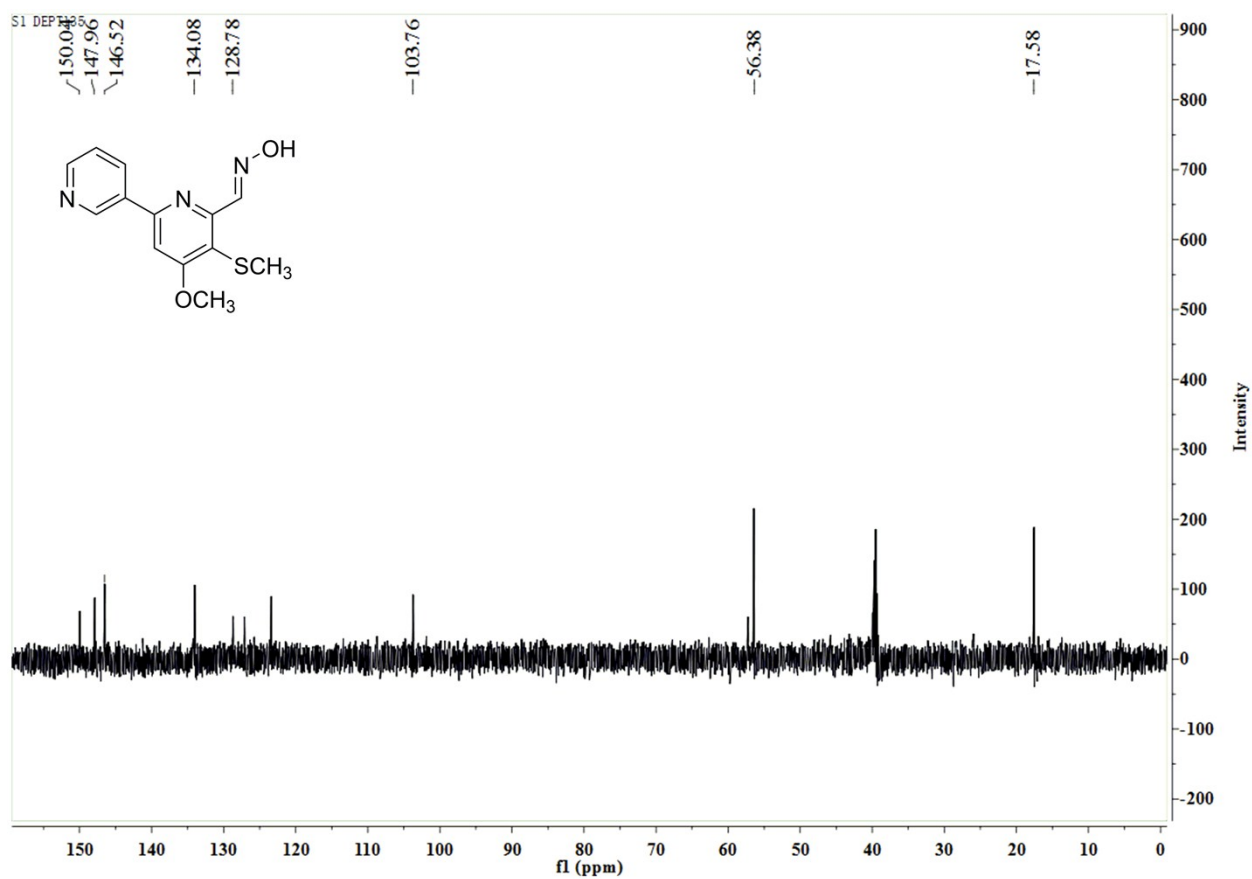

Figure S6. DEPT 135 (100 MHz, DMSO) spectrum of compound 1.

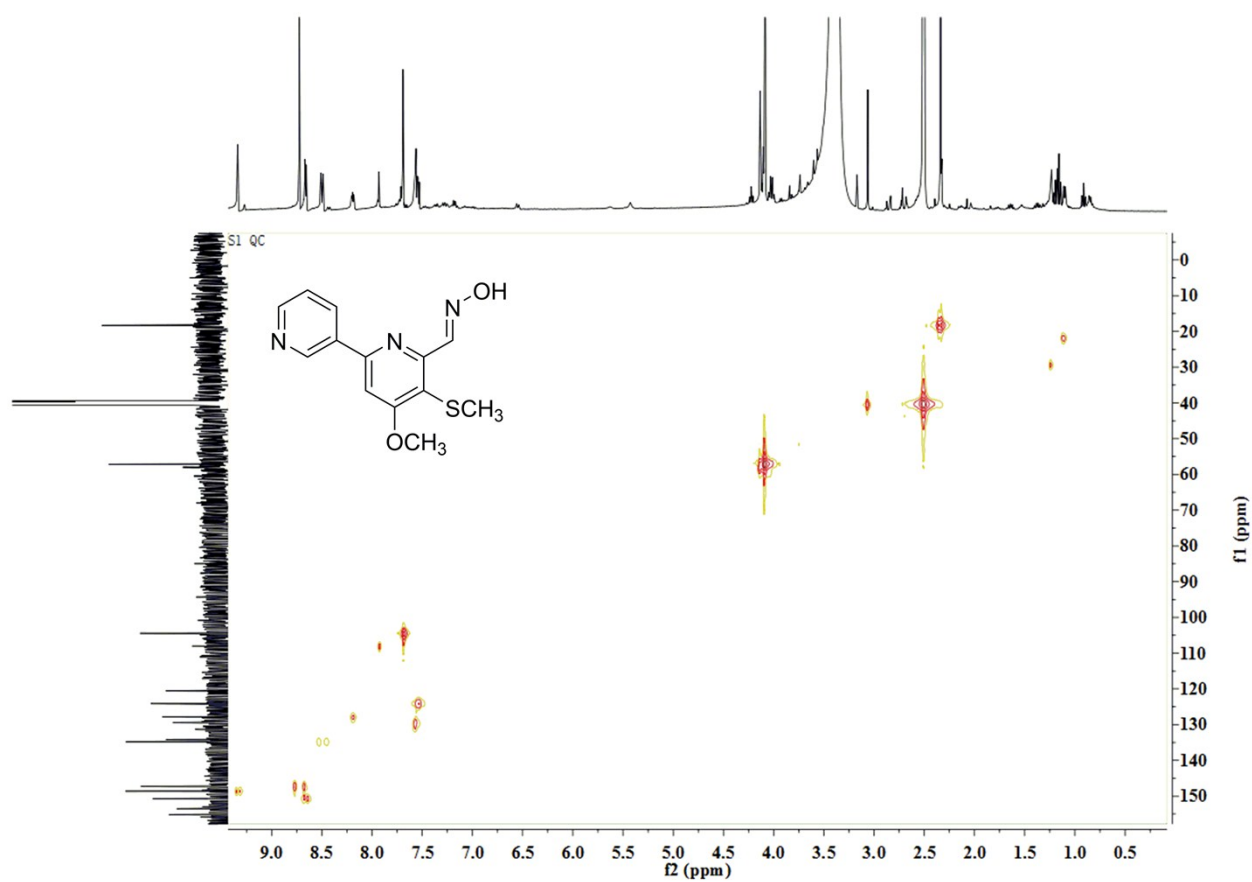

Figure S7. HSQC (400 MHz, DMSO) spectrum of compound 1.

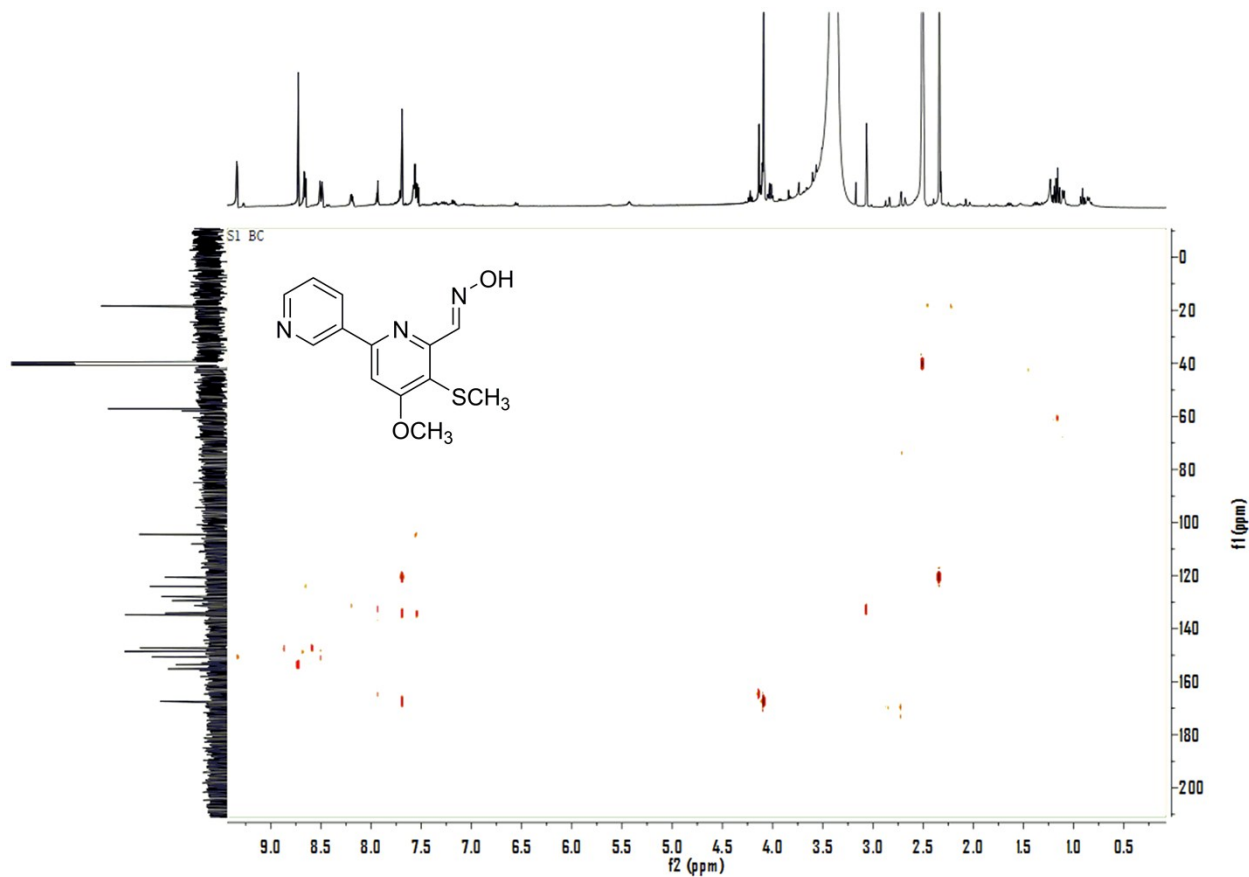

Figure S8. HMBC ( 400 MHz, DMSO) spectrum of compound 1.

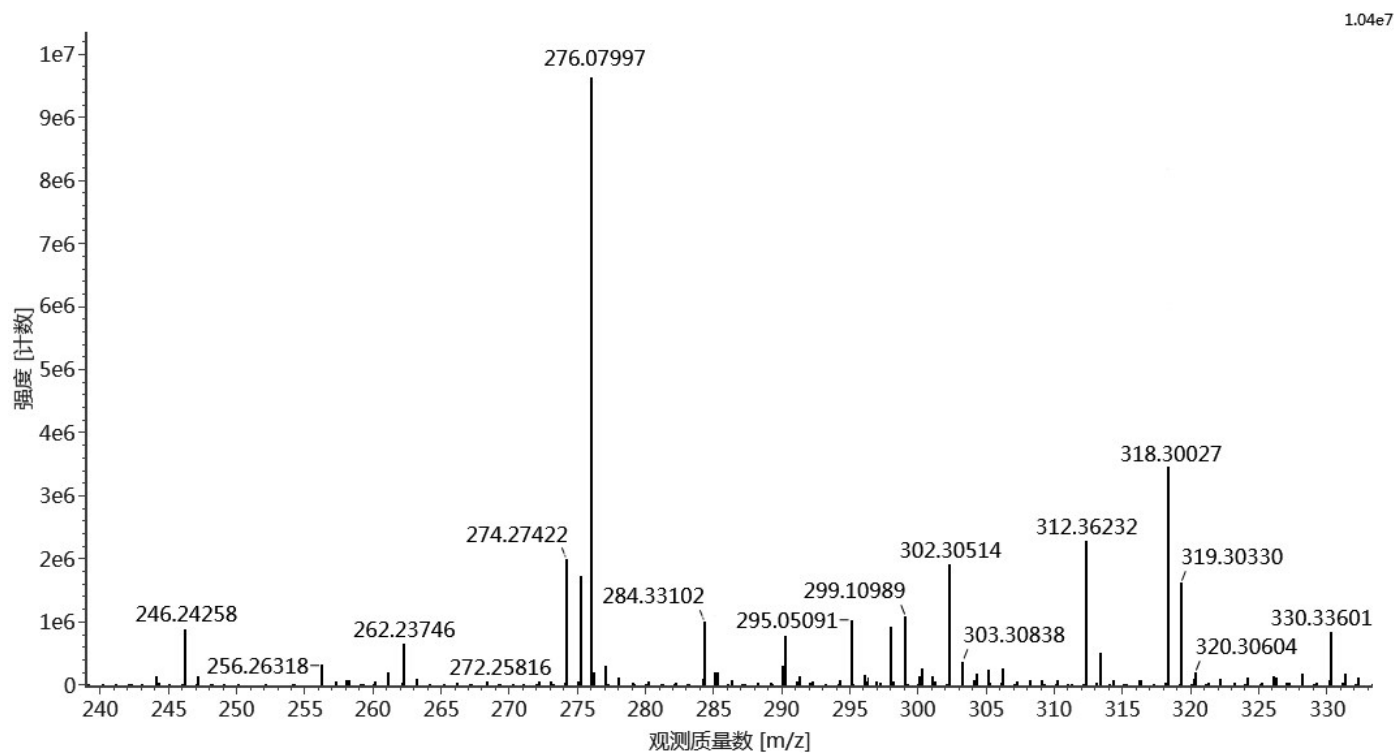

Figure S9. HRESIMS spectrum of compound 1.

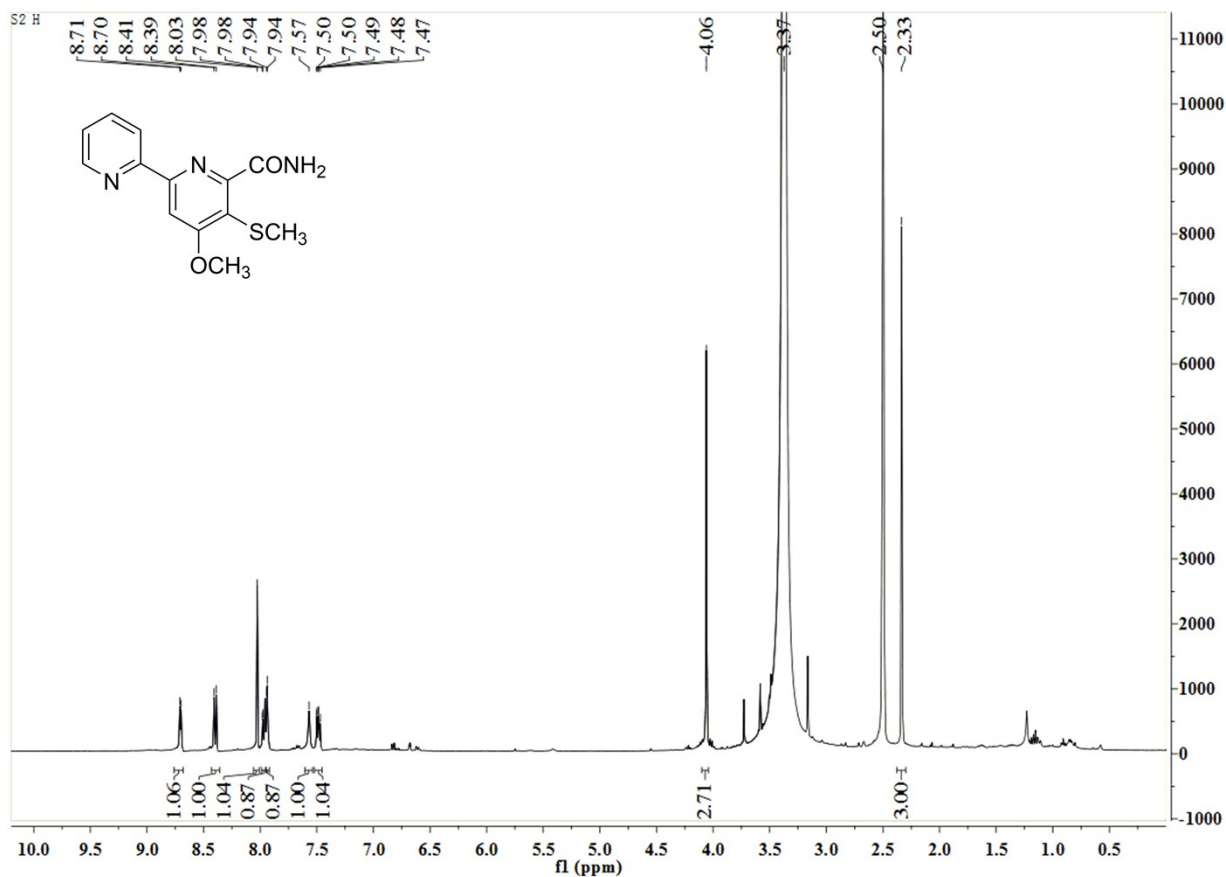

Figure S10.  $^1\text{H}$  NMR ( 400 MHz, DMSO) spectrum of compound 2.

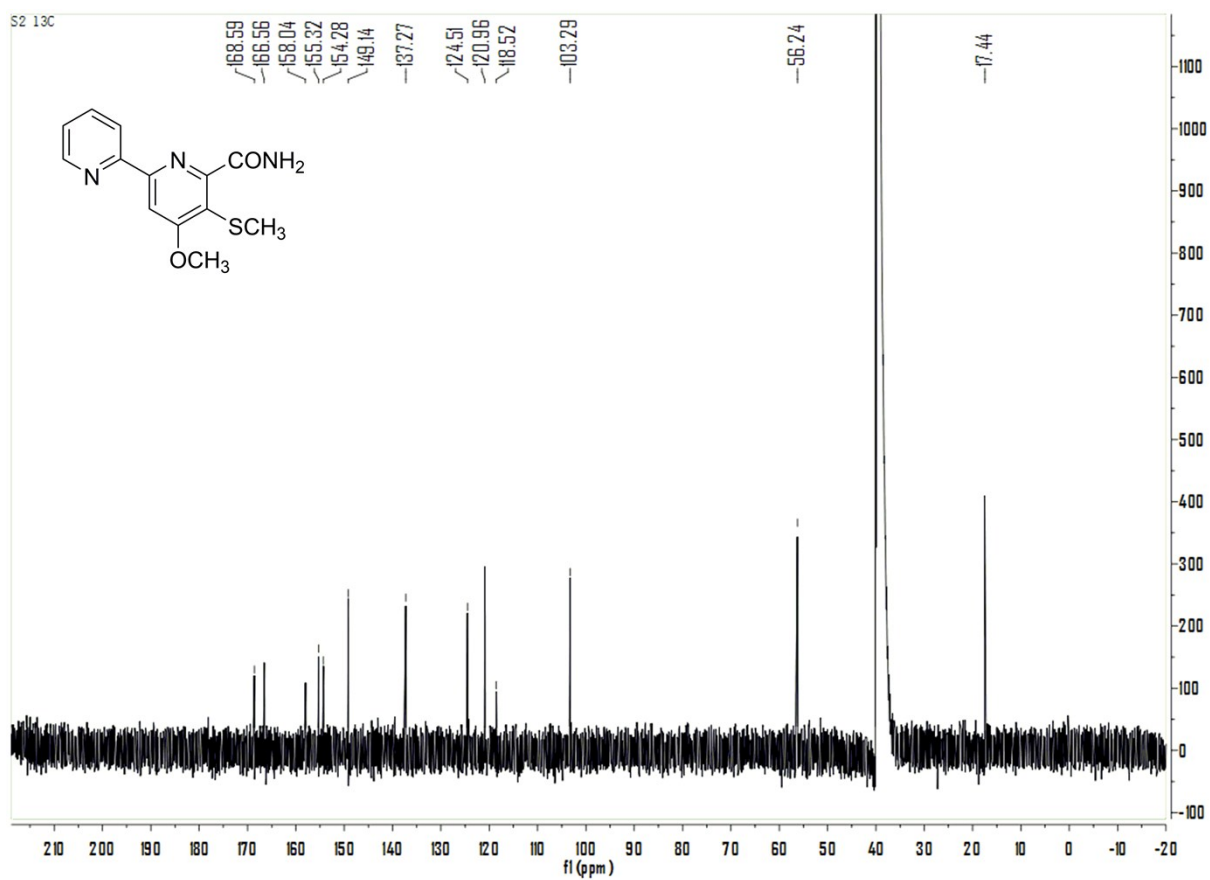

Figure S11.  $^{13}\text{C}$  NMR ( 100 MHz, DMSO) spectrum of compound 2.

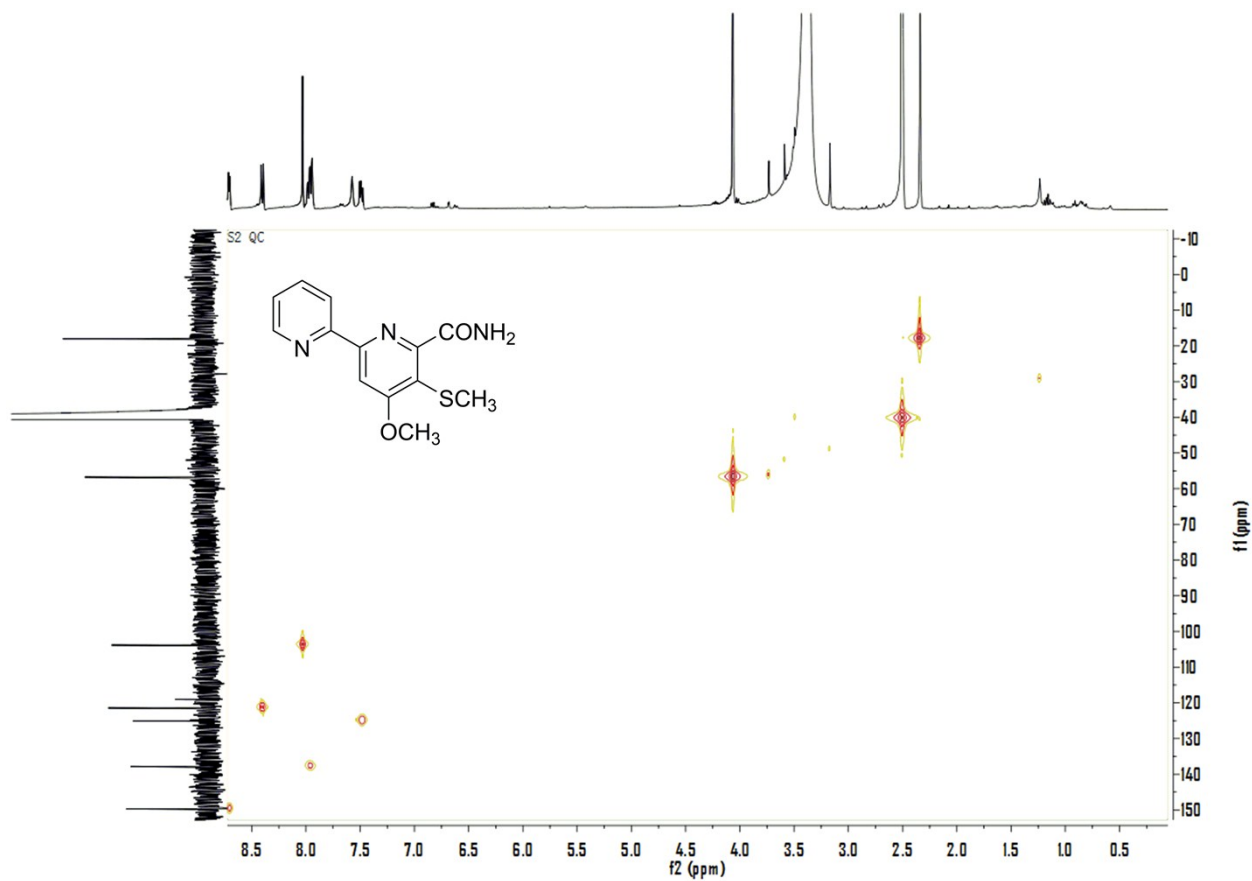

Figure S12. HSQC ( 400 MHz, DMSO) spectrum of compound 2.

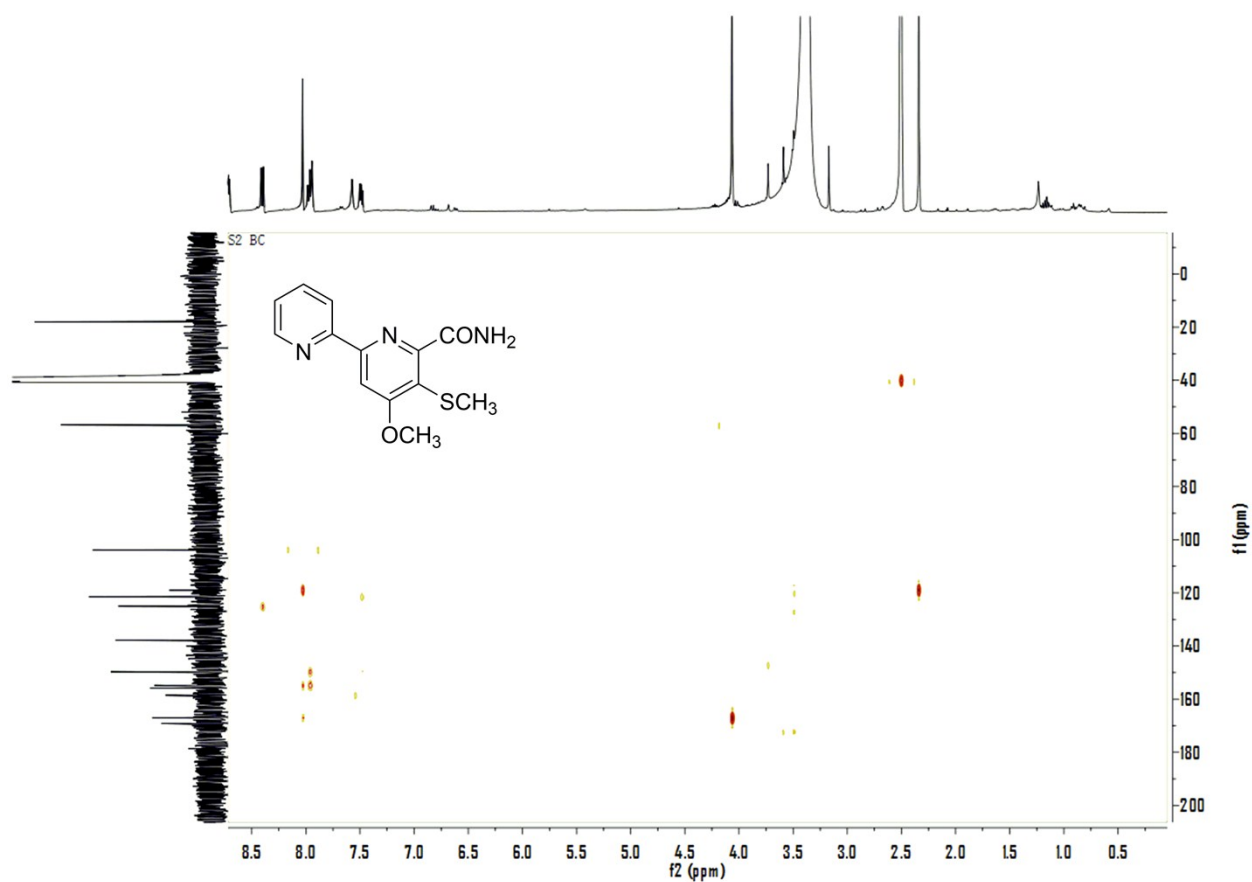

Figure S13. HMBC ( 400 MHz, DMSO) spectrum of compound 2.

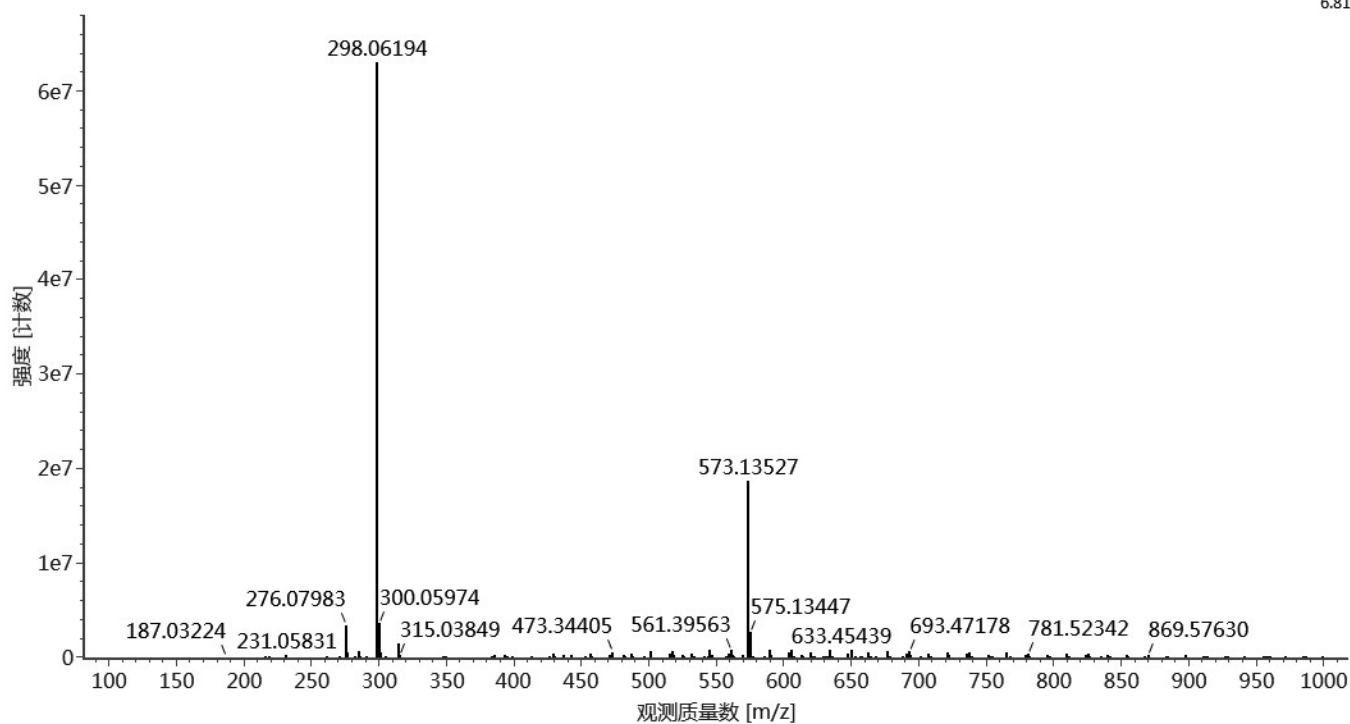

Figure S14. HRESIMS spectrum of compound 2.

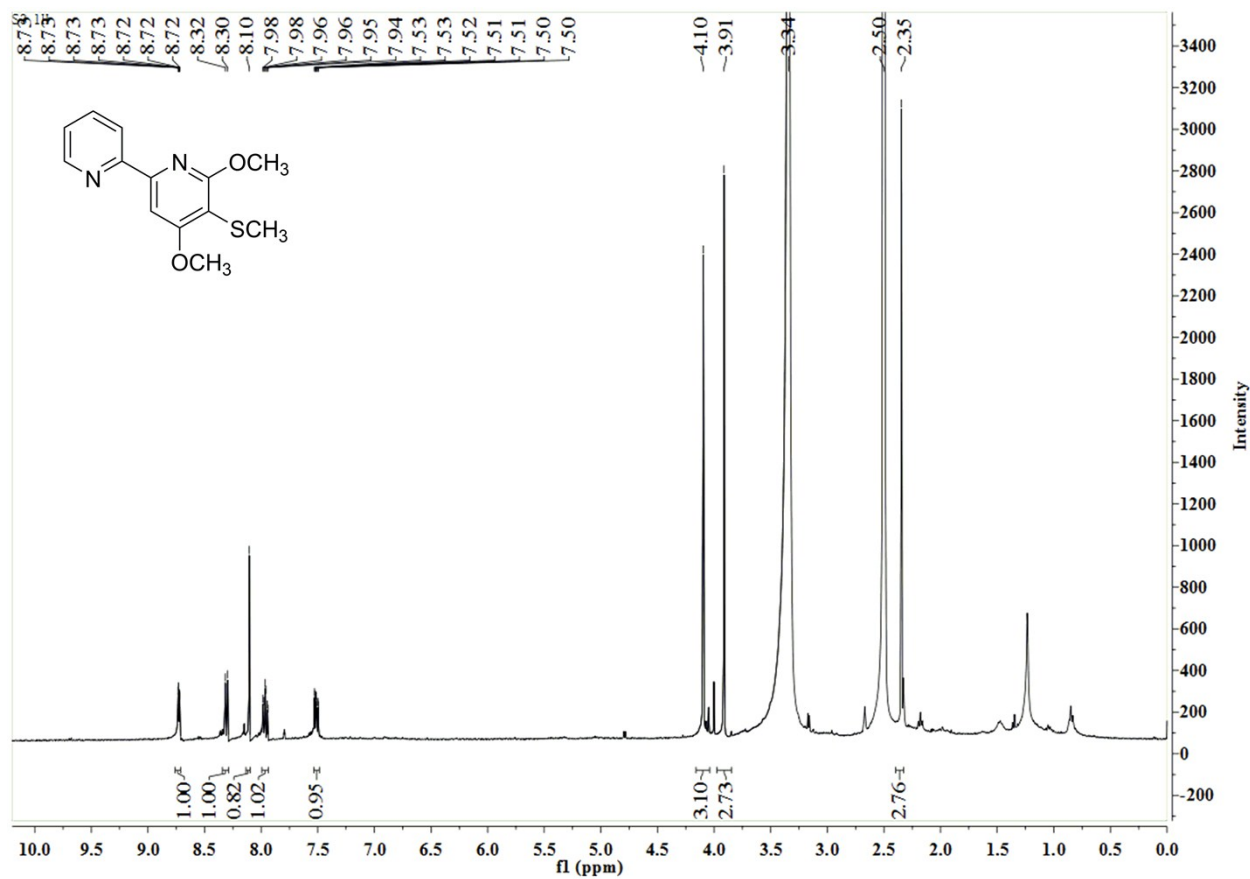Figure S15. <sup>1</sup>H NMR (400 MHz, DMSO) spectrum of compound 3.

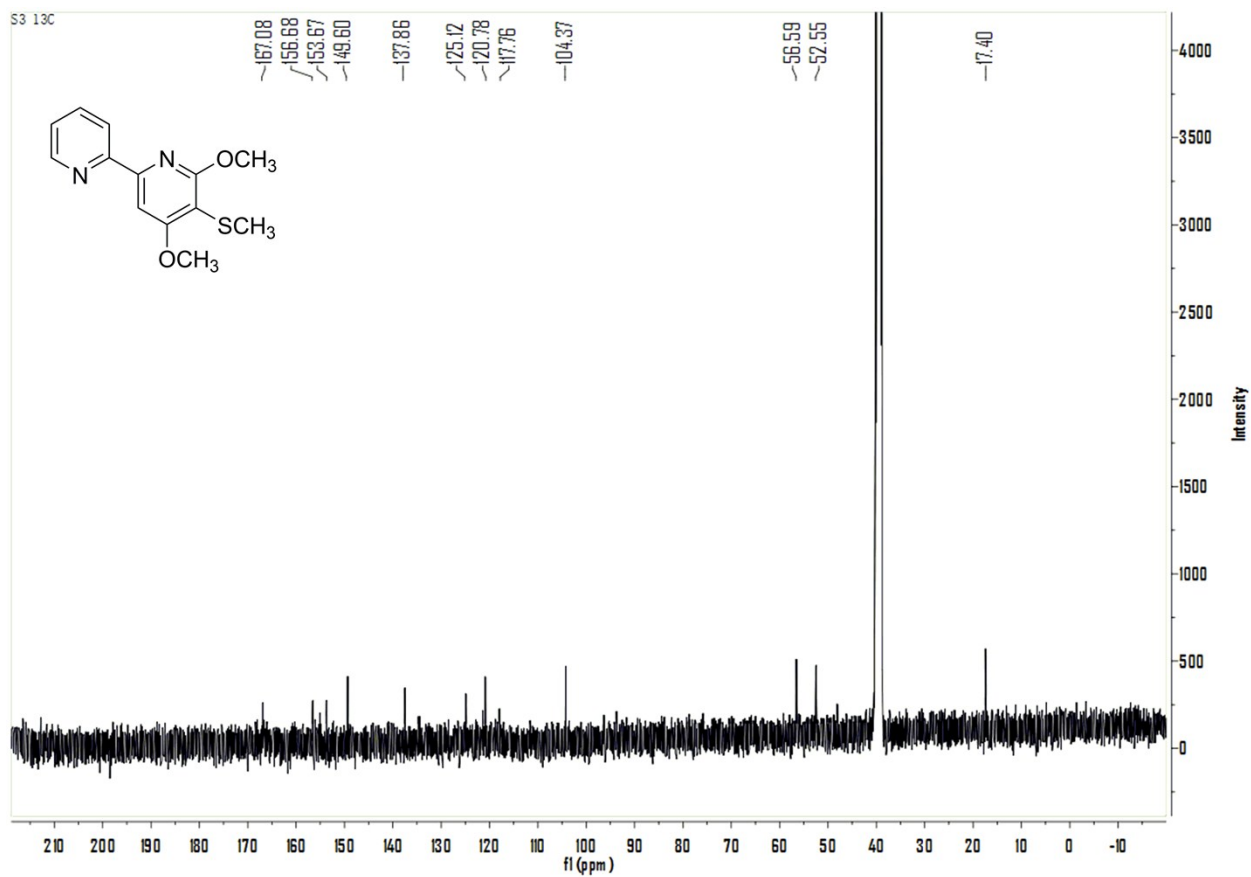

Figure S16.  $^{13}\text{C}$  NMR ( 100 MHz, DMSO) spectrum of compound 3.

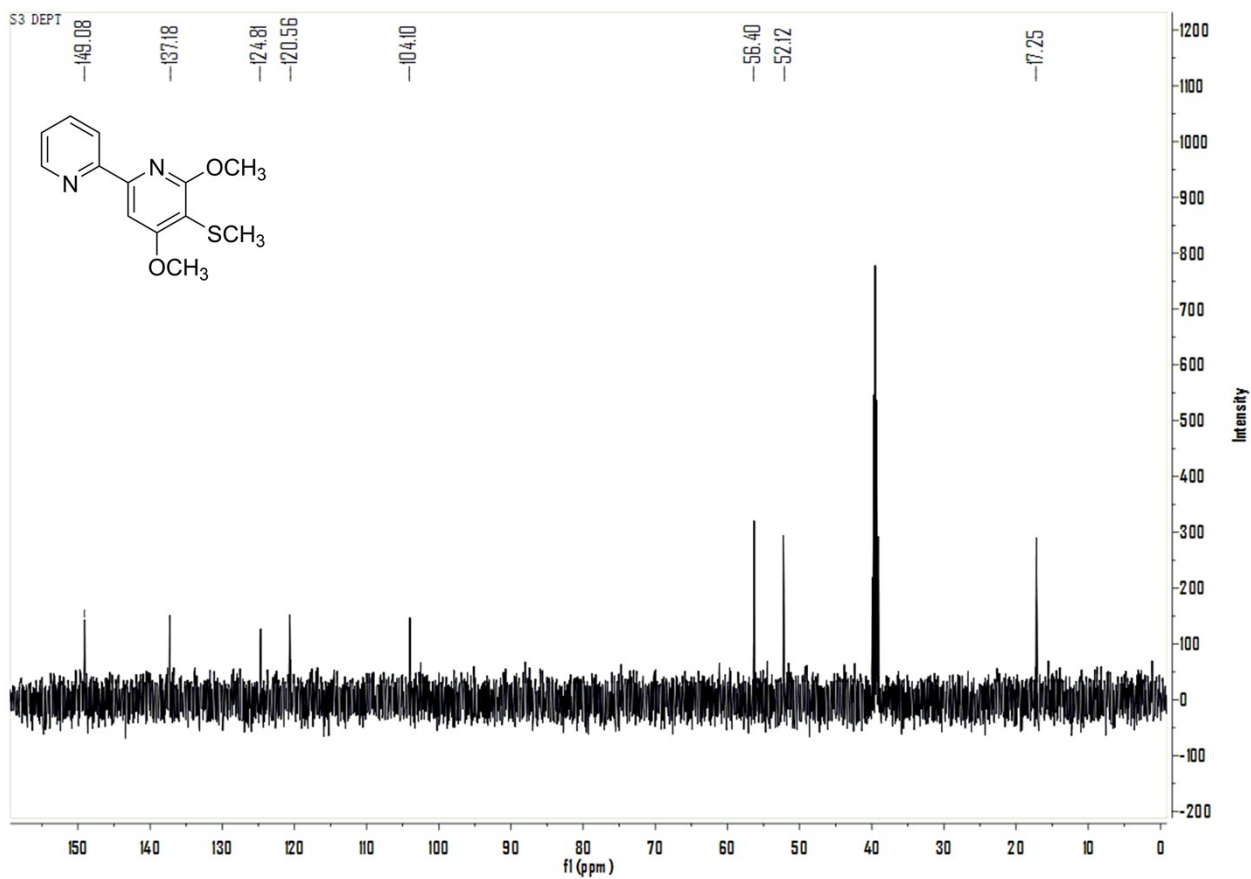

Figure S17. DEPT 135 ( 100 MHz, DMSO) spectrum of compound 3.



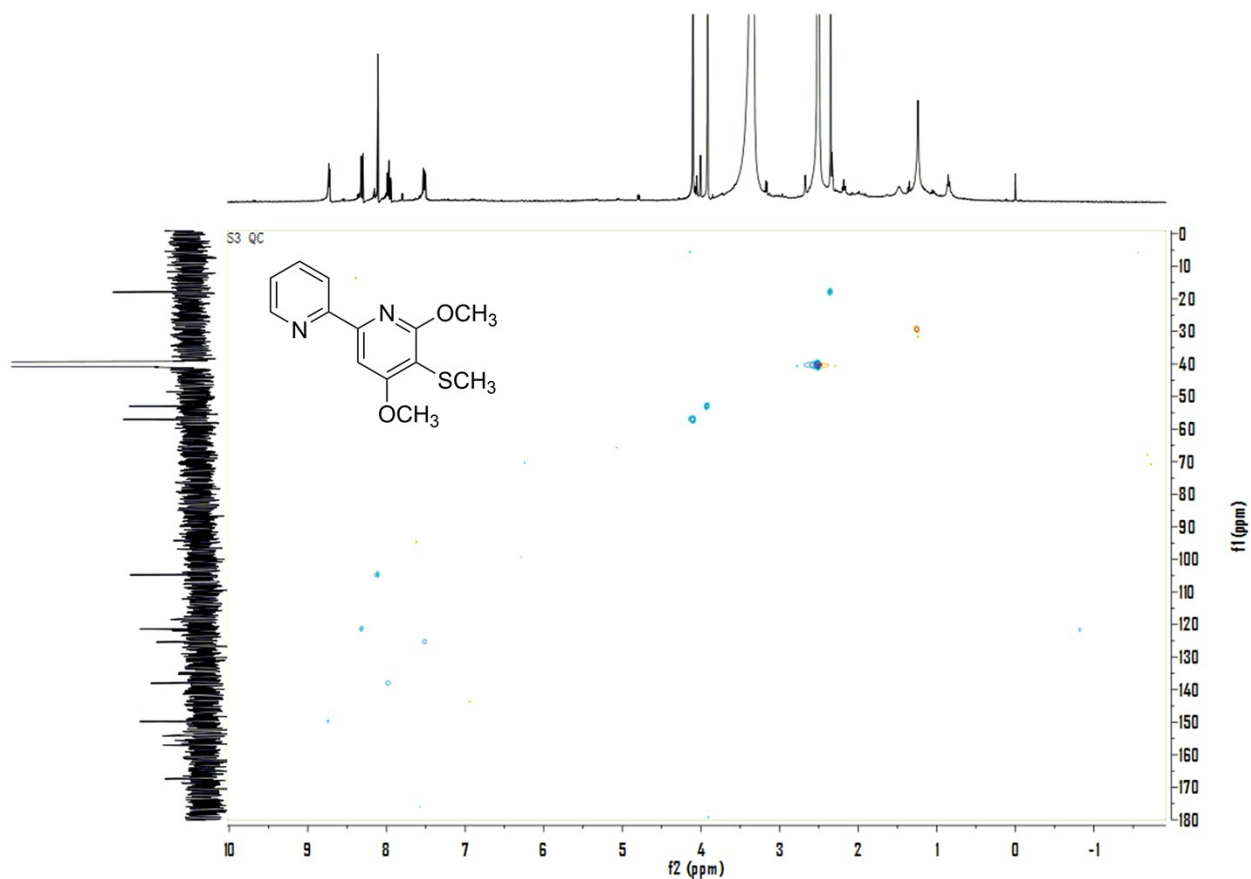

Figure S18. HSQC( 400 MHz, DMSO) spectrum of compound **3**.

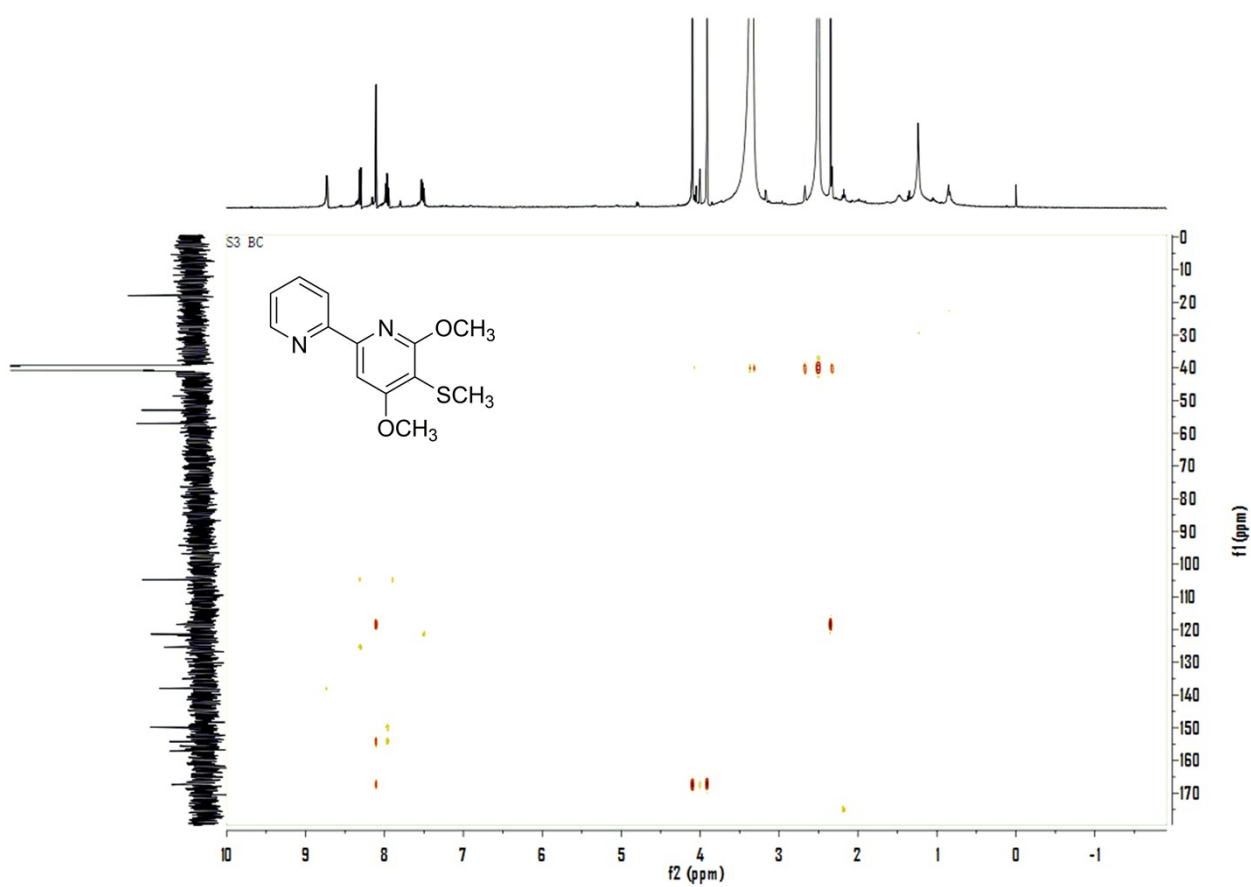

Figure S19. HMBC ( 400 MHz, DMSO) spectrum of compound **3**.

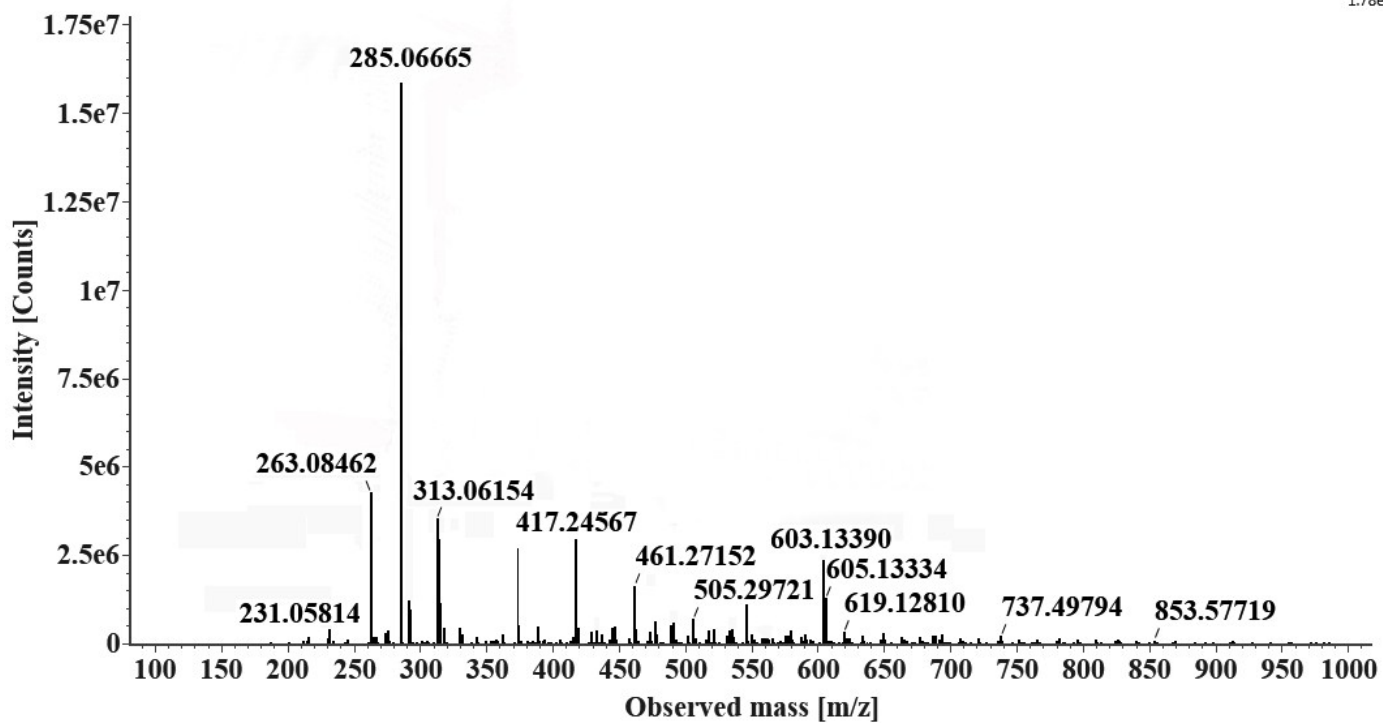

Figure S20. HRESIMS spectrum of compound 3

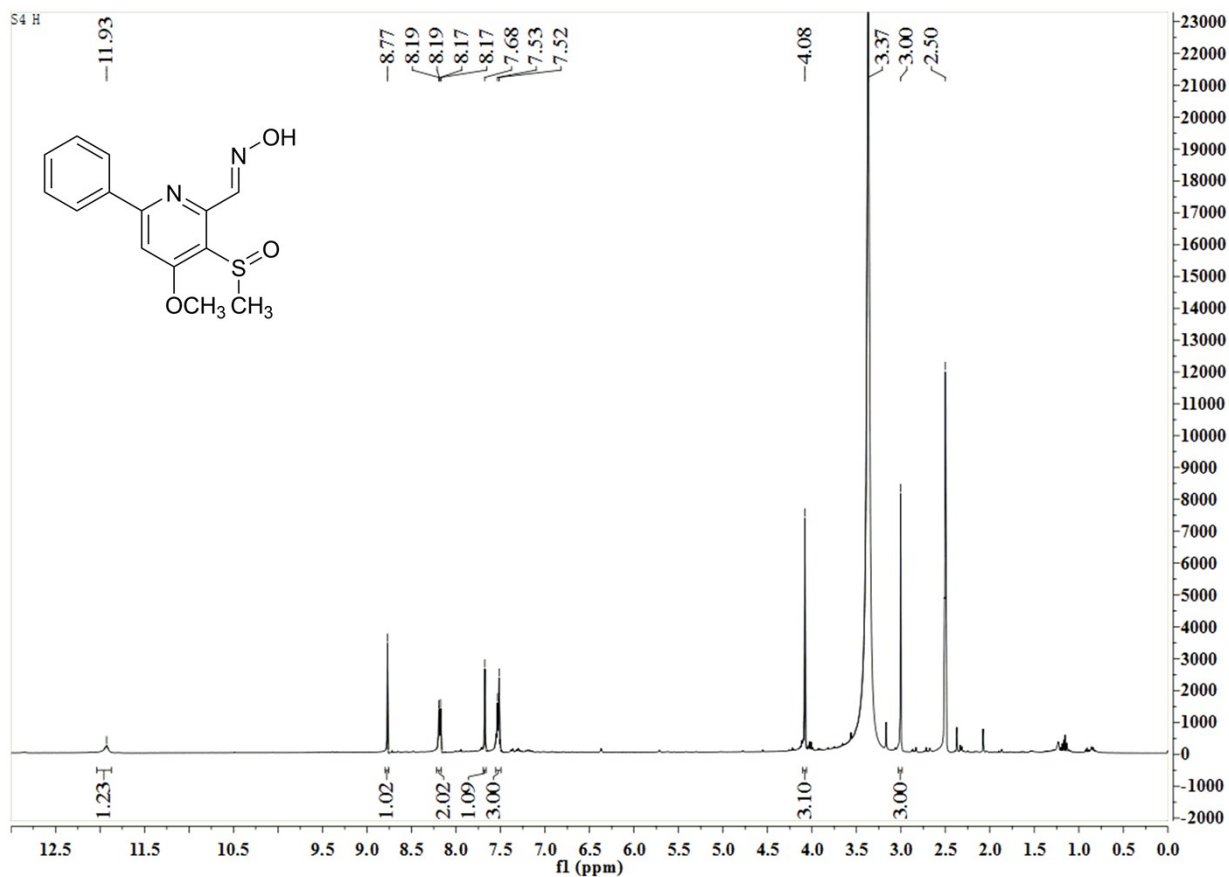Figure S21. <sup>1</sup>H NMR (400 MHz, DMSO) spectrum of compound 4.

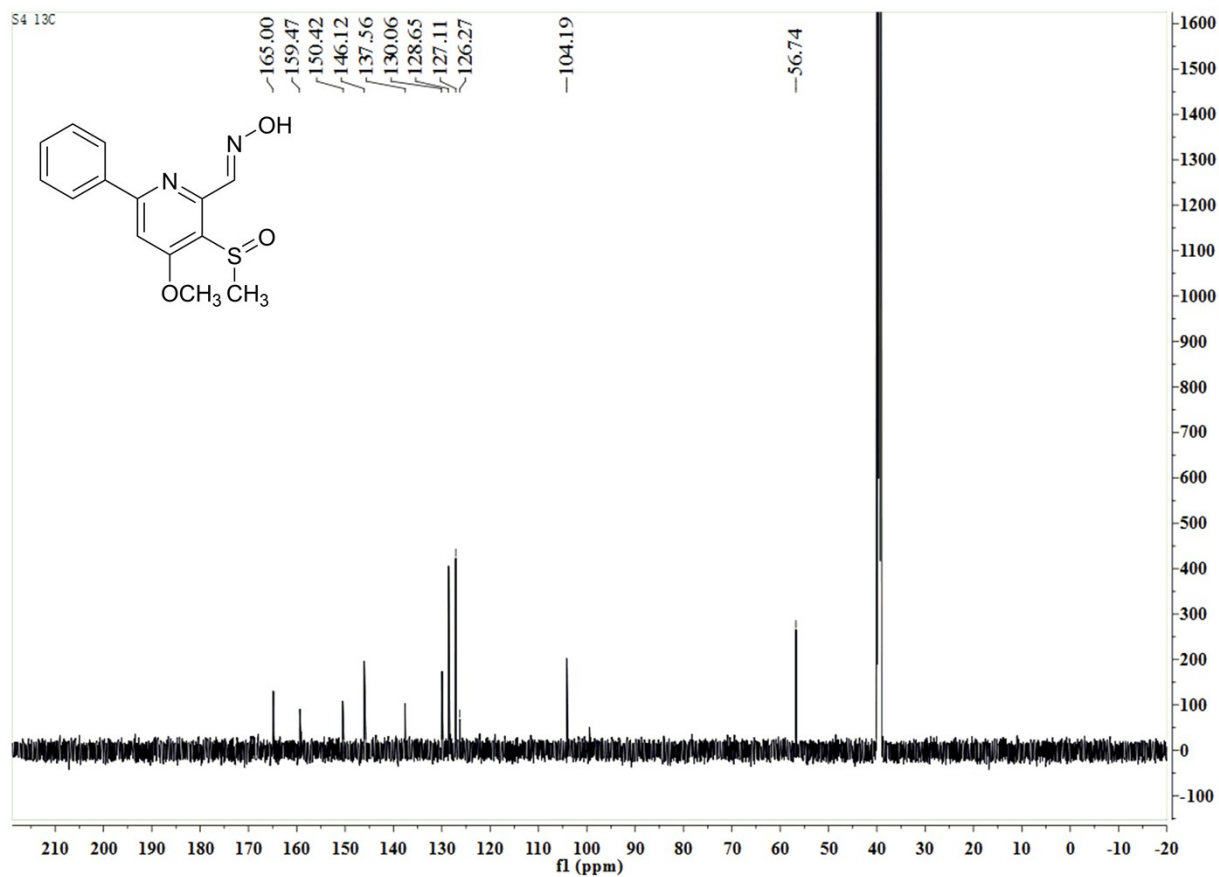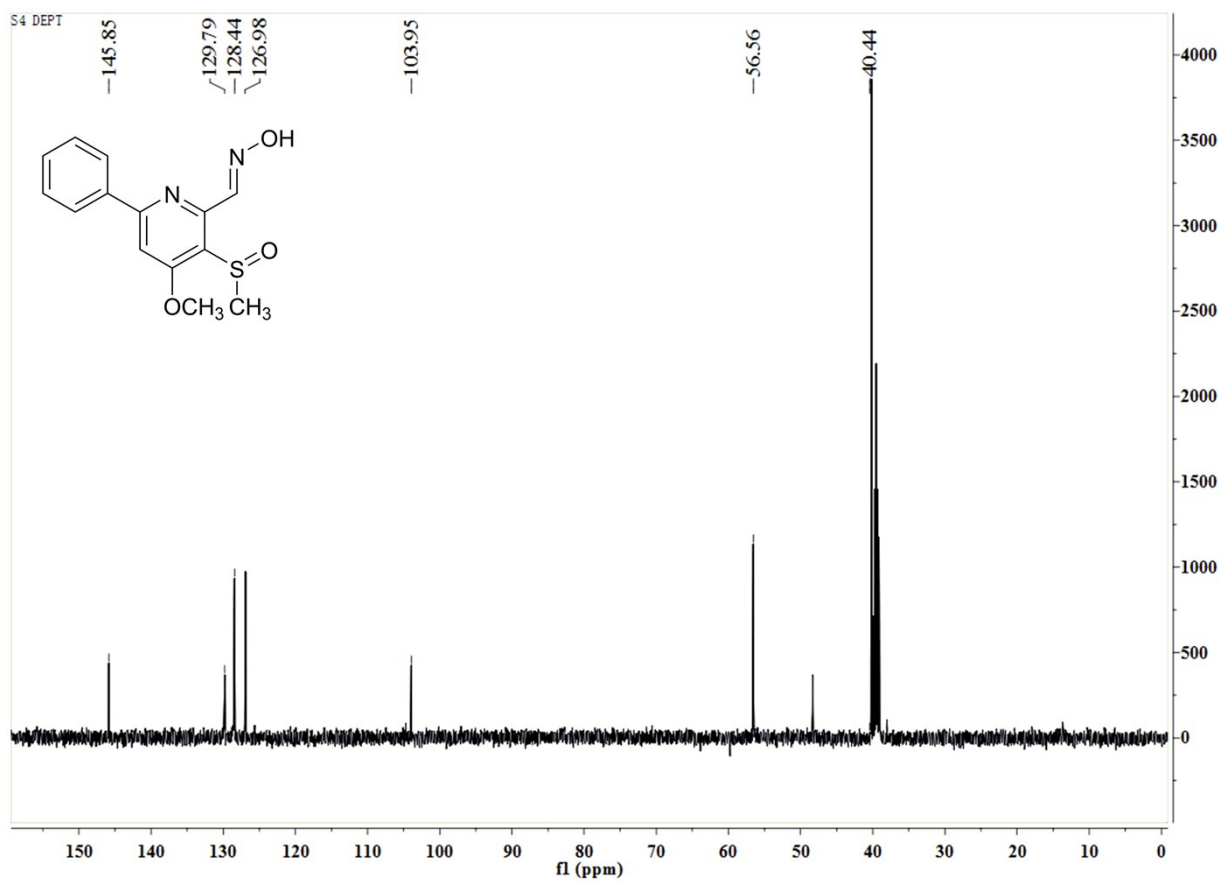

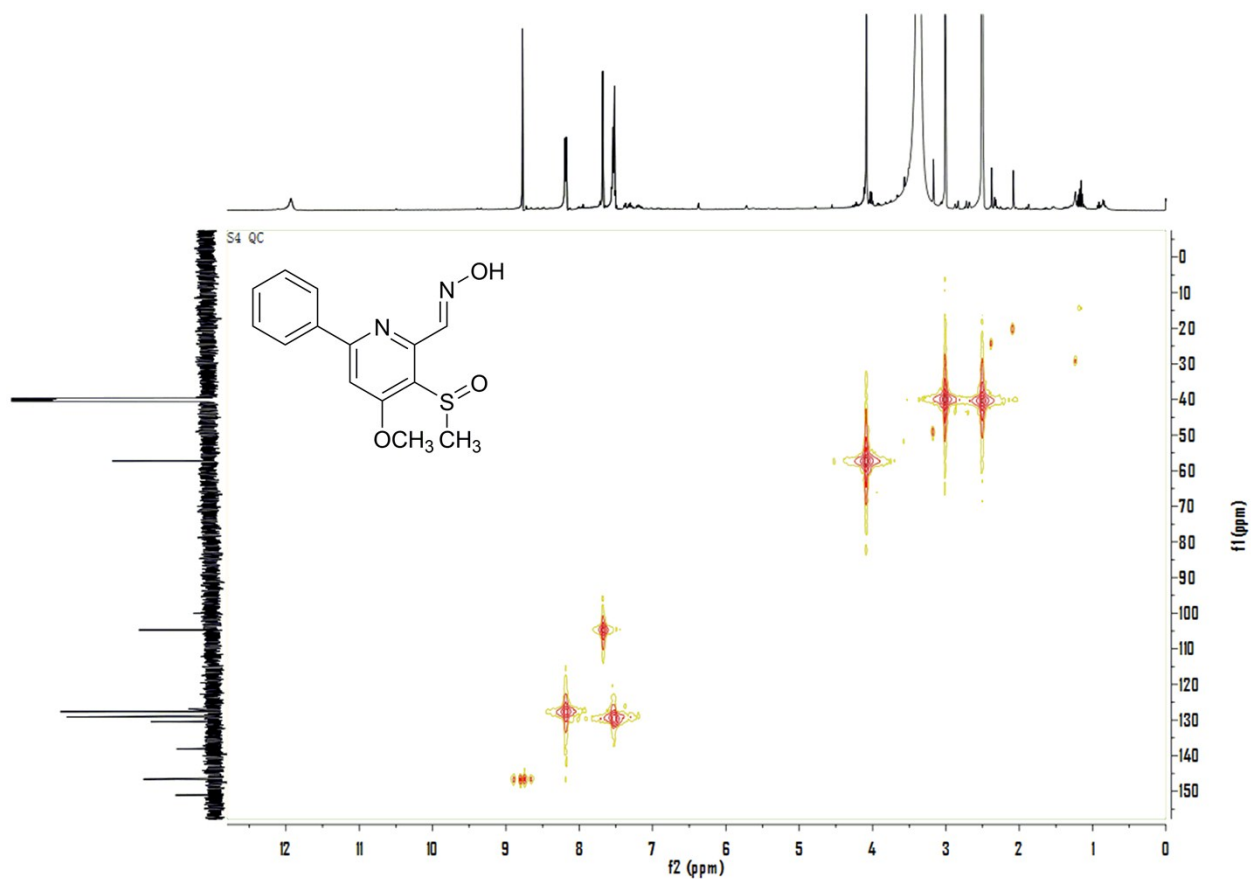

Figure S24. HSQC ( 400 MHz, DMSO) spectrum of compound 4.

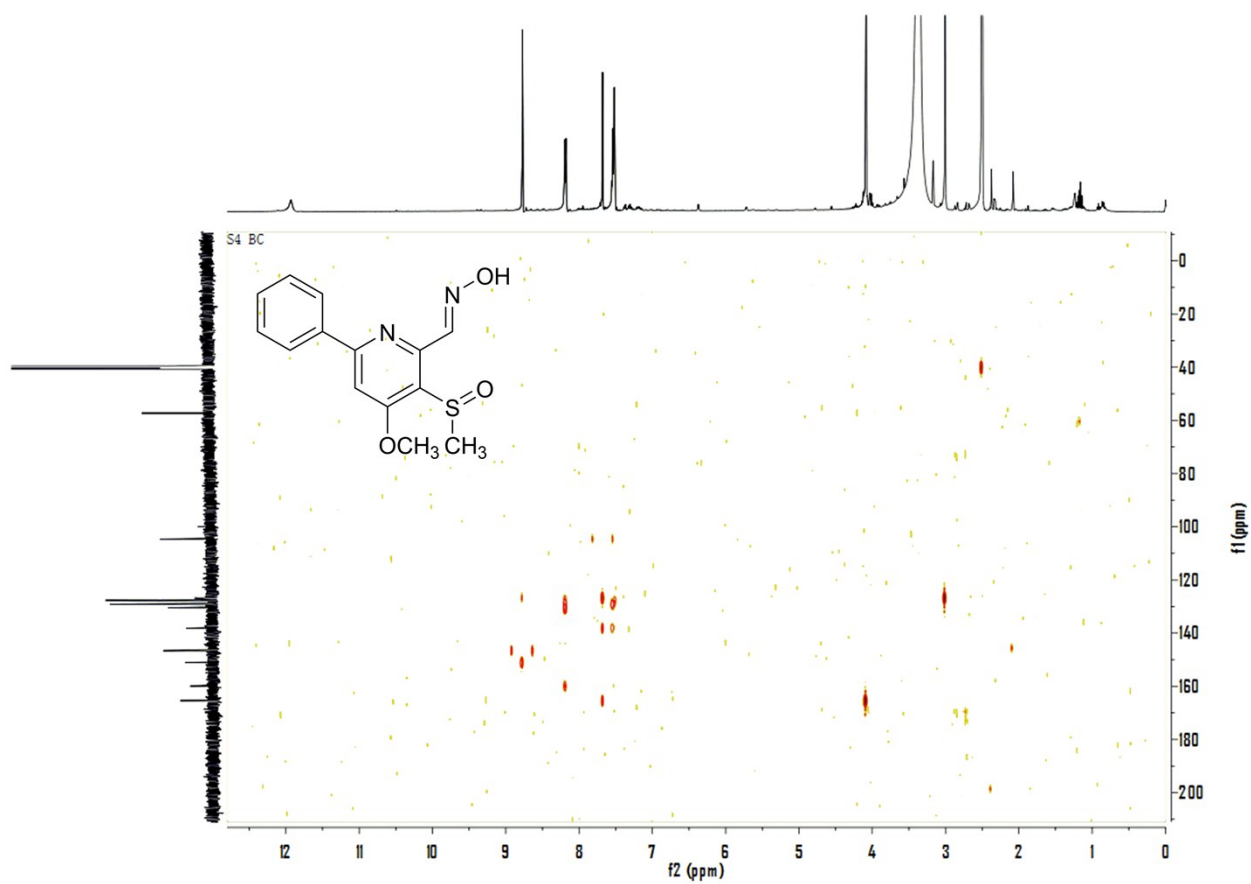

Figure S25. HMBC ( 400 MHz, DMSO) spectrum of compound 4.

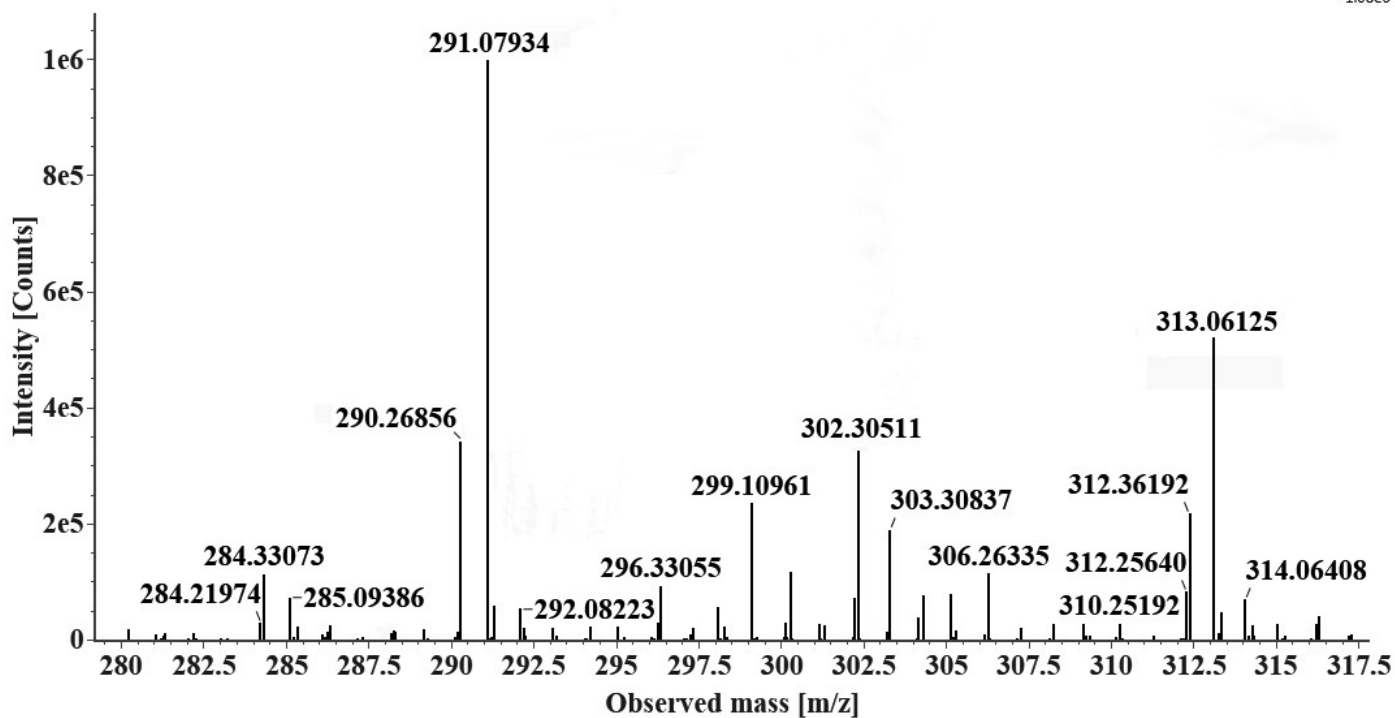

Figure S26. HRESIMS spectrum of compound 4.

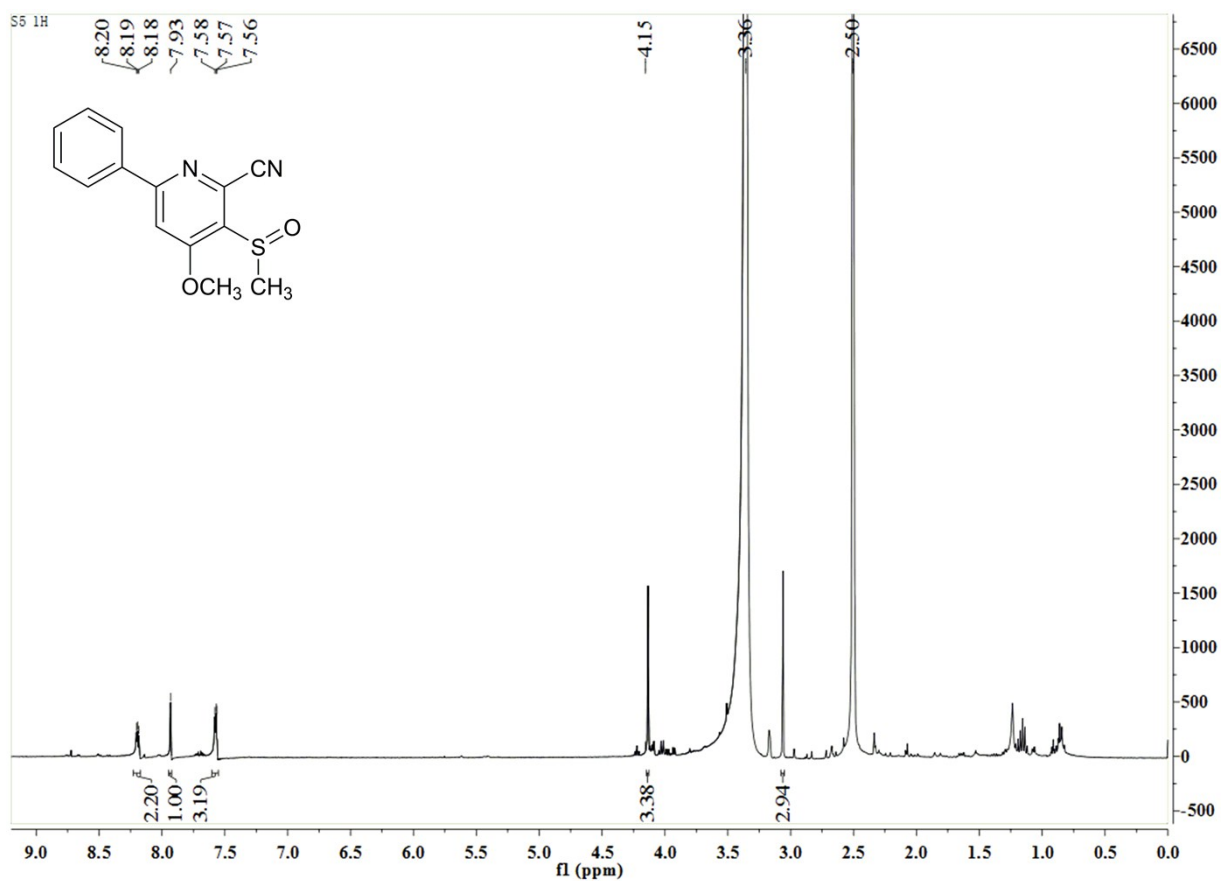Figure S27. <sup>1</sup>H NMR (400 MHz, DMSO) spectrum of compound 5.

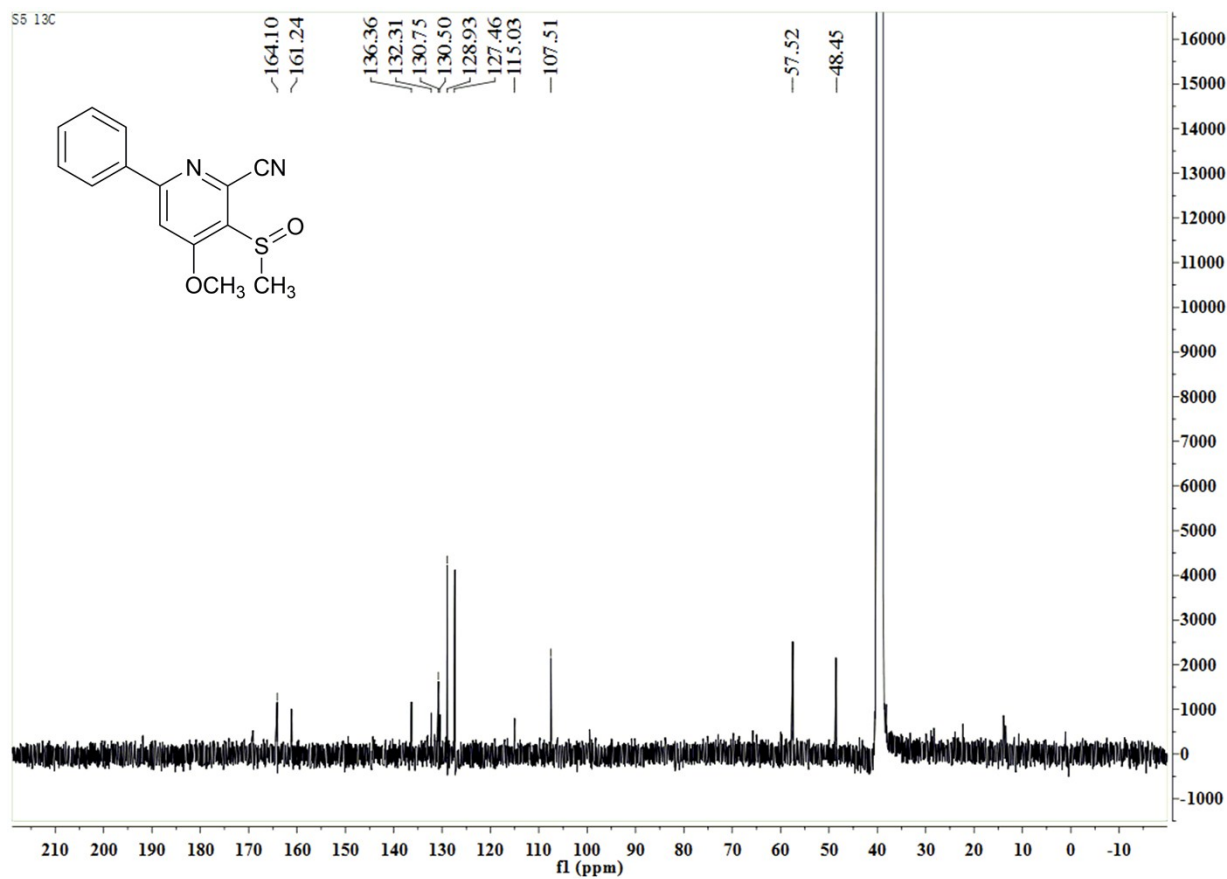

Figure S28. <sup>13</sup>C NMR ( 100 MHz, DMSO) spectrum of compound 5.

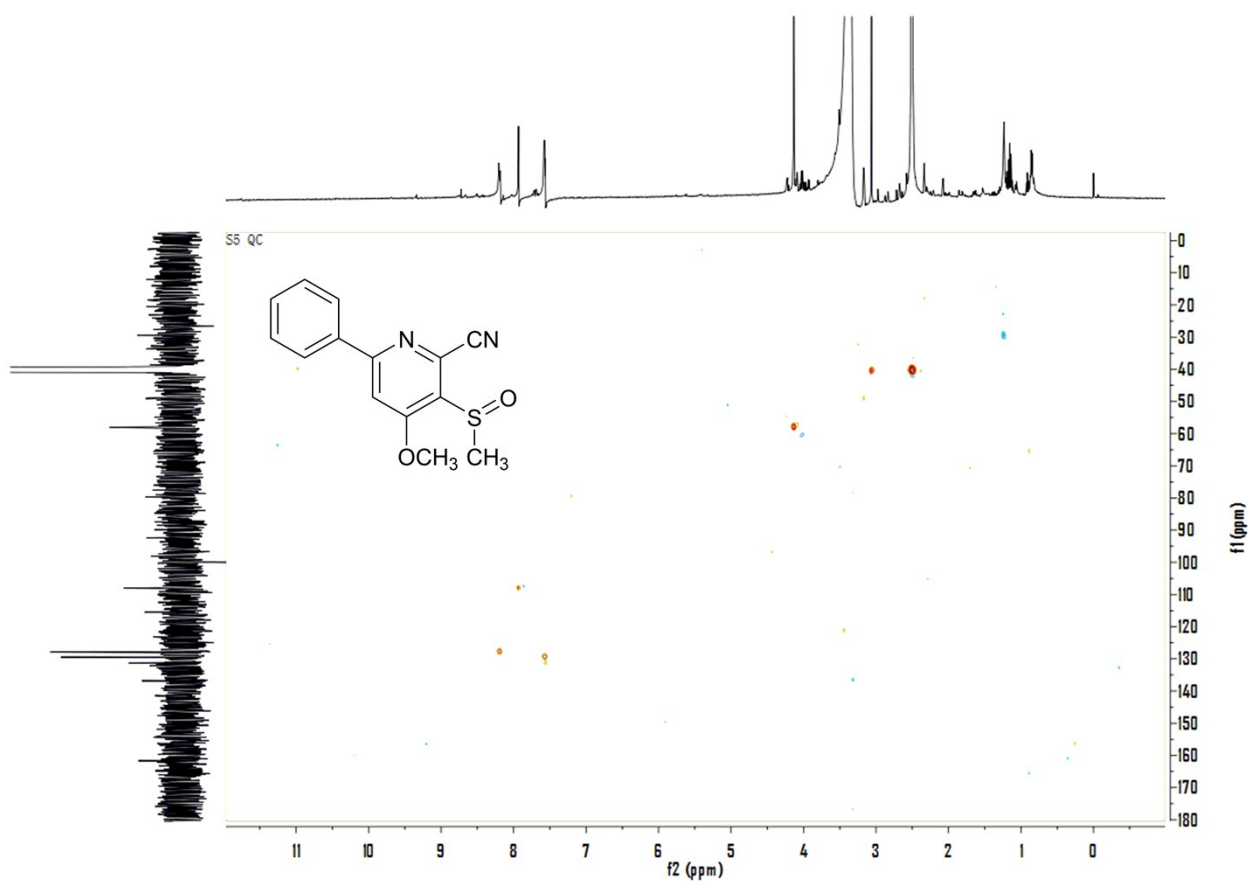

Figure S29. HSQC ( 400 MHz, DMSO) spectrum of compound 5.

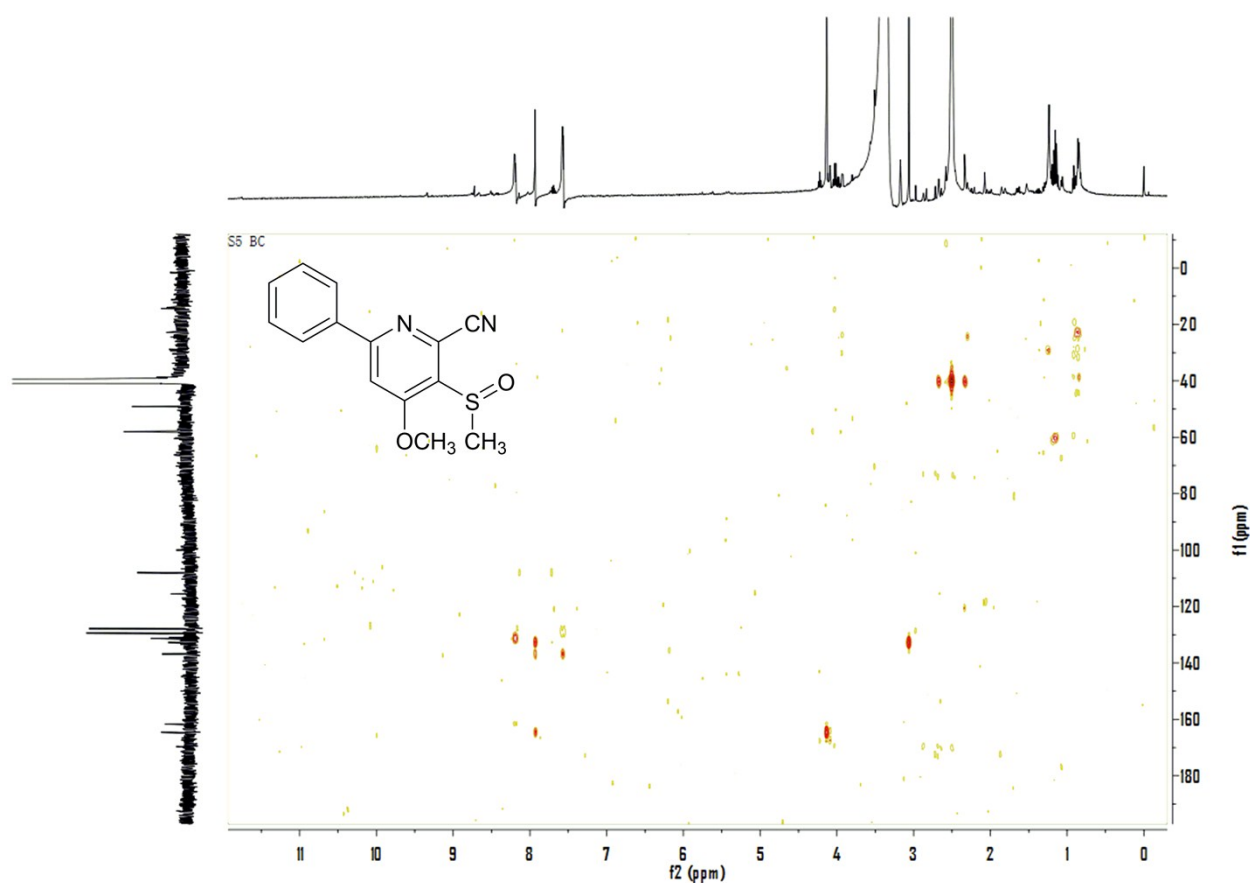

Figure S30. HMBC ( 400 MHz, DMSO) spectrum of compound **5**.

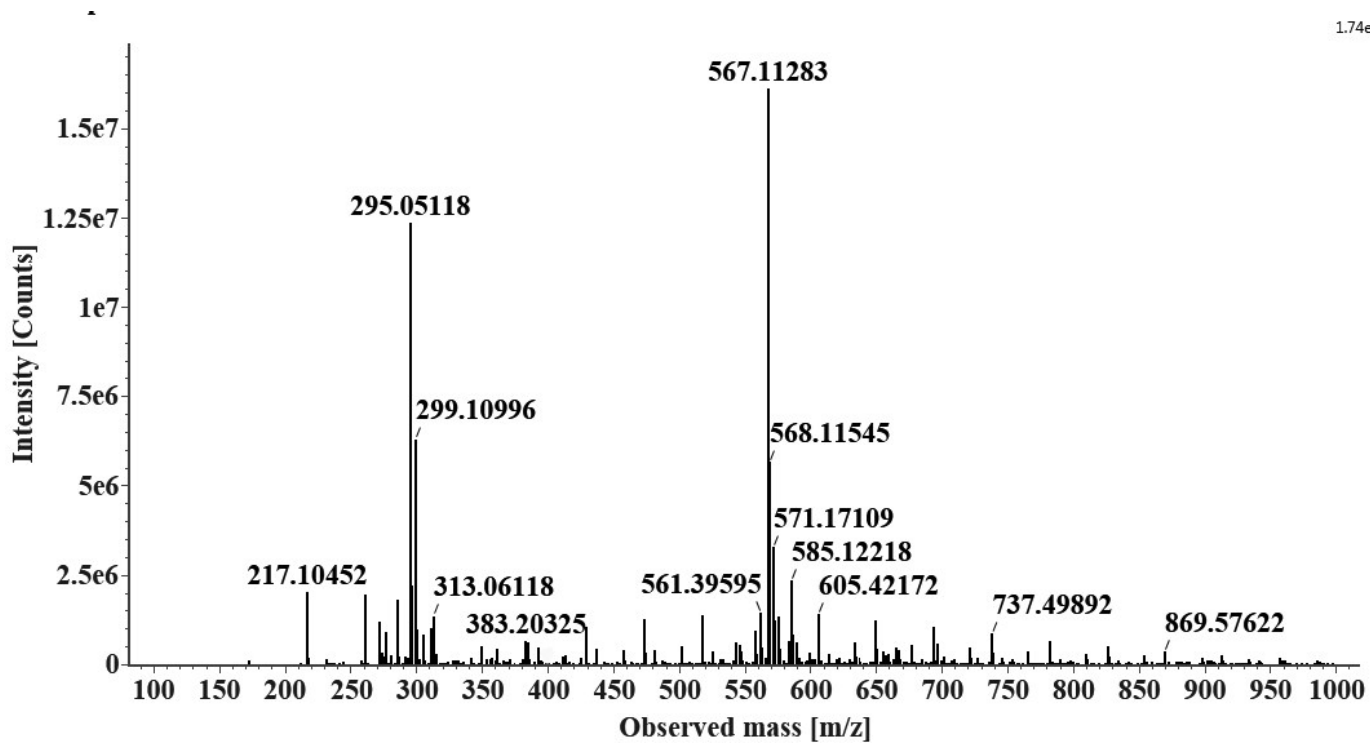

Figure S31. HRESIMS spectrum of compound **5**

1.74e7



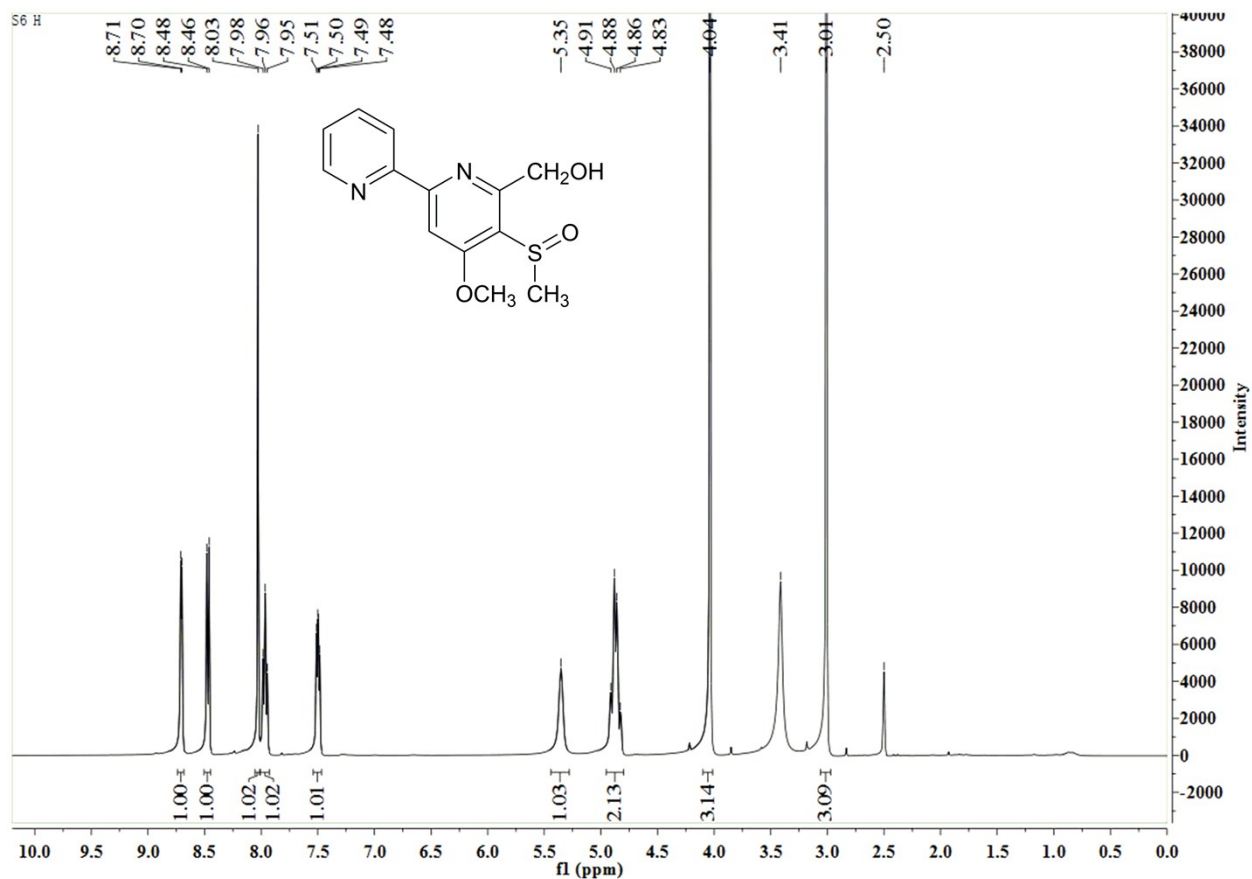

Figure S32.  $^1\text{H}$  NMR ( 400 MHz, DMSO) spectrum of compound 6.

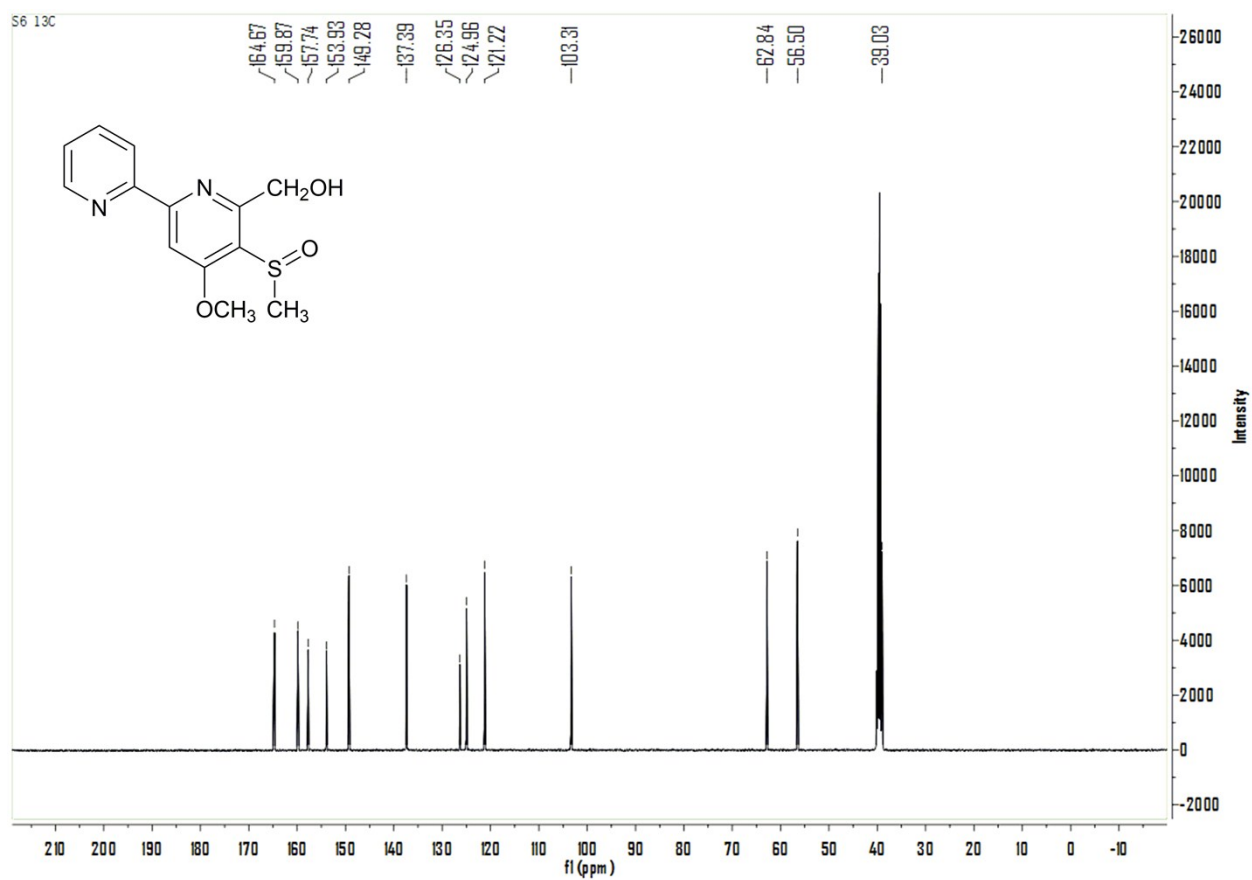

Figure S33.  $^{13}\text{C}$  NMR ( 100 MHz, DMSO) spectrum of compound 6.



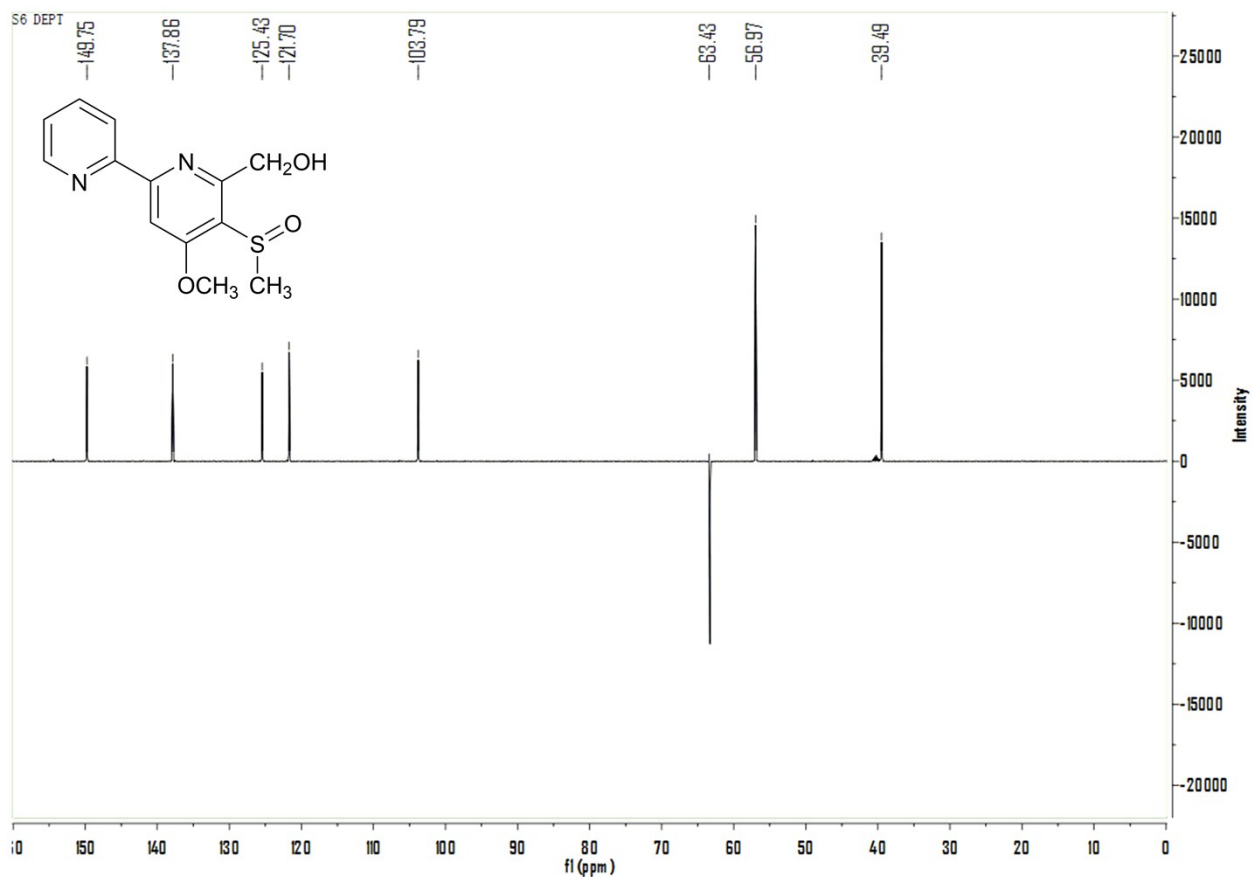

Figure S34. DEPT 135 ( 100 MHz, DMSO) spectrum of compound 6.

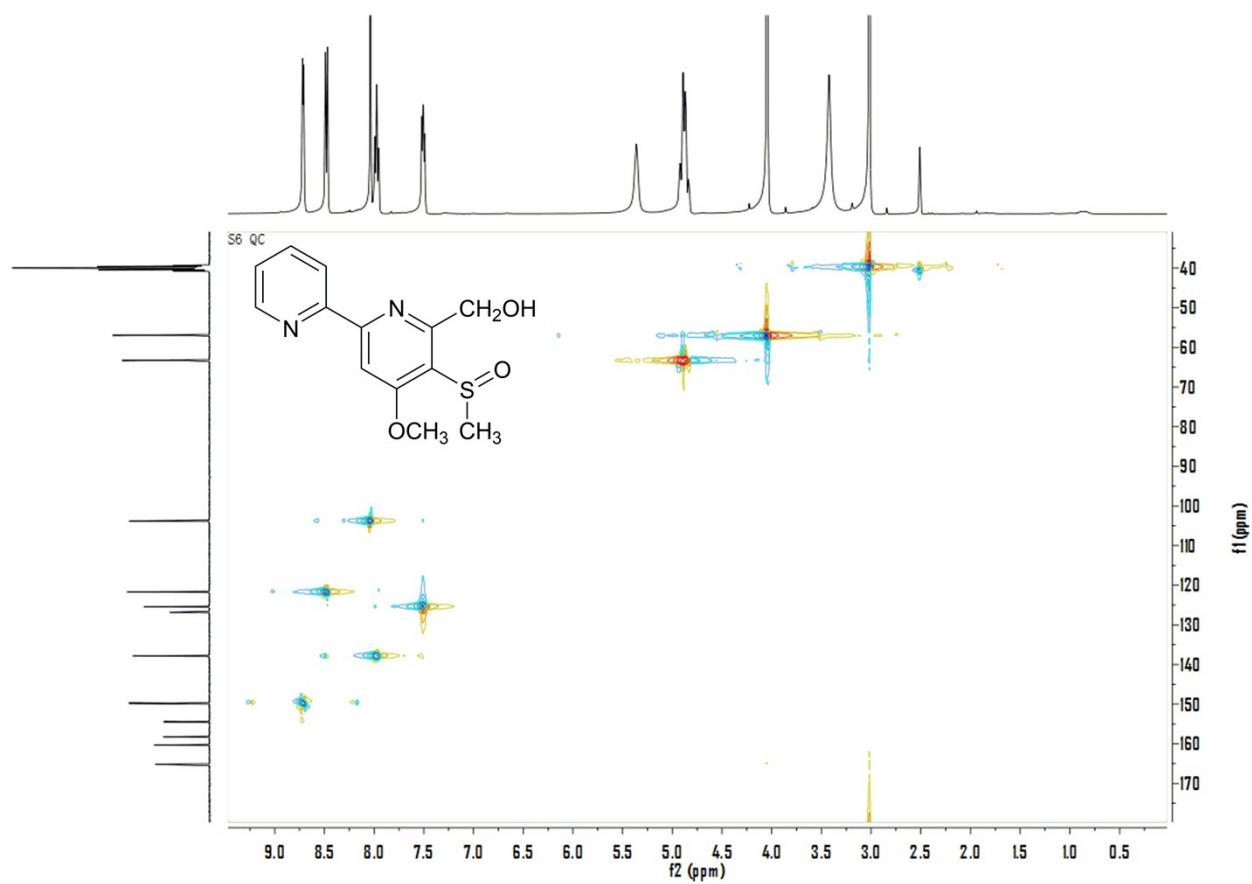

Figure S35. HSQC ( 400 MHz, DMSO) spectrum of compound 6.

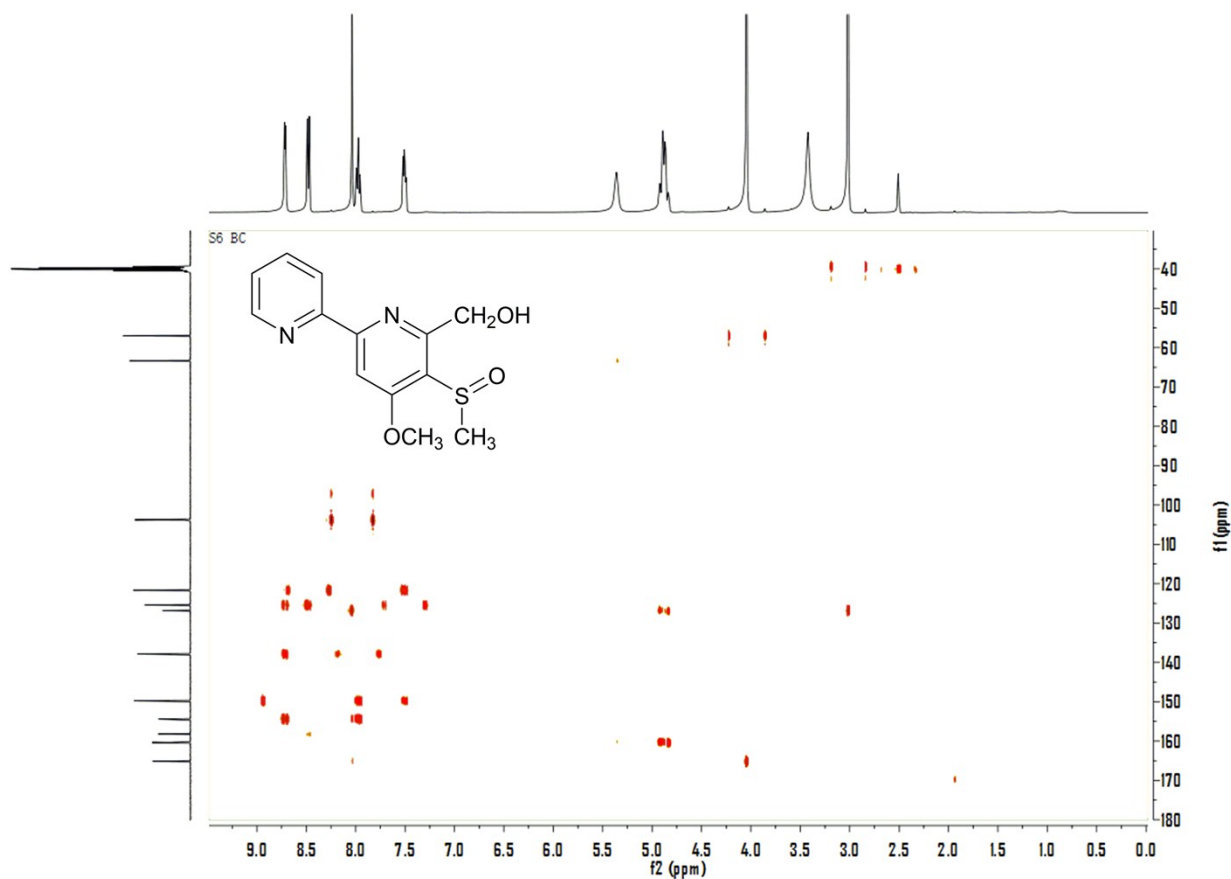

Figure S36. HMBC ( 400 MHz, DMSO) spectrum of compound 6.

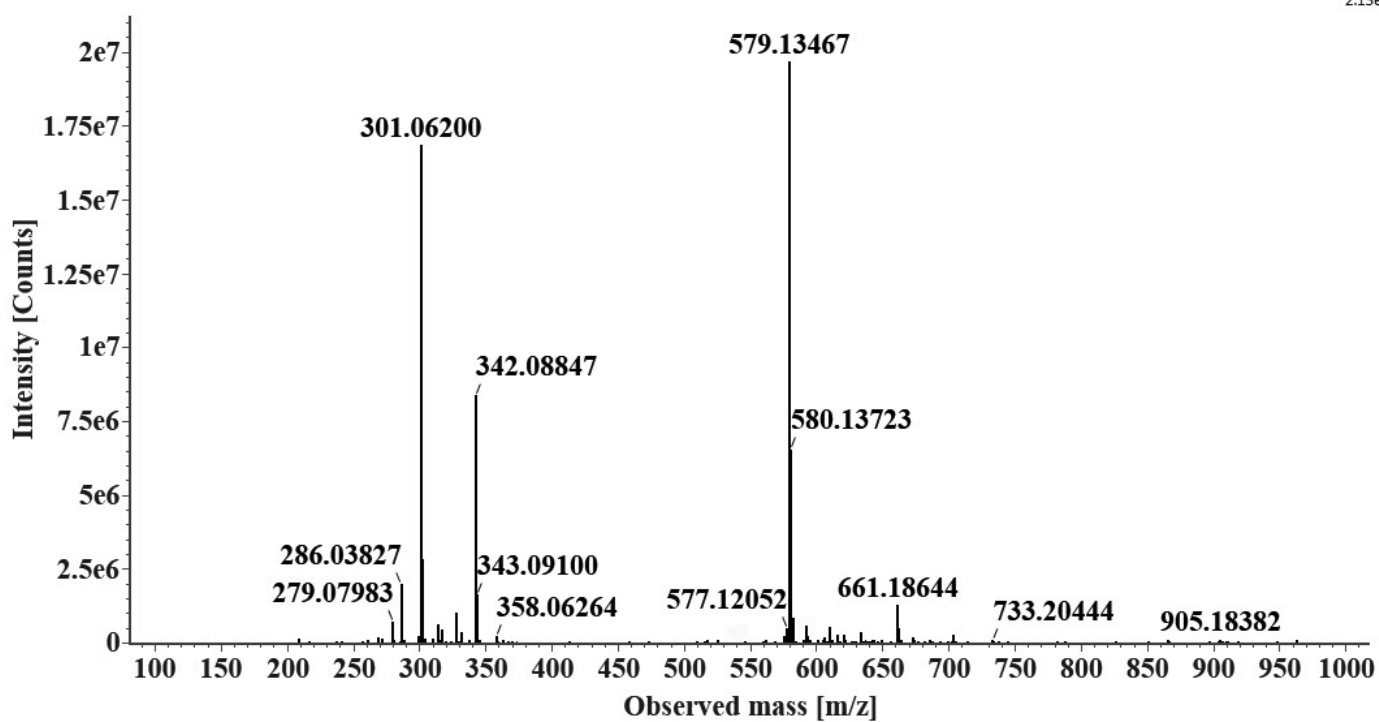

Figure S37. HRESIMS spectrum of compound 6.

2.13e7
